# Supplementary material for: Applying the Action Principle of Classical Mechanics to the Thermodynamics of the Troposphere
Source: MDPI journal article supplement (doi:10.3390/applmech4020037), 2023-06-05
Supplement: s1 [file s1]

# Supplementary Materials for

## Applying the Action Principle of Classical Mechanics to the Thermodynamics of Tropospheric Systems

*Applied Mechanics*

**This PDF file includes:**

1. CARNOT8/CAL. Windows TRS32 Multidos Astrocal program for Carnot Cycle data in Table 1. Data printout for Argon and Dinitrogen is included.
2. ENTROPY8/CAL. Windows TRS32 Multidos Astrocal program for calculation of translational, rotational entropy and Gibbs energy of gases in the Earth's atmosphere.
3. TURBINE5/CAL. Windows TRS32 Multidos Astrocal program for Vevor Turbine to estimate wind power.
4. TROPCYC2/CAL. Windows TRS32 Multidos Astrocal program for charging power of tropical cyclone. Data printout for charging a 500 km cyclone in the southern hemisphere is included.

All code is produced in Vernon Hester's program Astrocal for Multidos TRS80 microcomputer, based on Texas Instruments SR52 programmable logic. Programs can easily be prepared in other software, such as R, Mathematica or Python.

Please contact [ivan.kennedy@sydney.edu.au](mailto:ivan.kennedy@sydney.edu.au) for further information, suggestions for improvements or reports of errors.



CARNOT8 Carnot Cycle Ar N2 H2O  
 Corrected 26 Aug 2022, for use of Zt  
 Estimates ratios frequency w/w, radii  
 Estimates  $\theta$ ,  $h\nu$ ,  $v$ , wavelength in cycl  
 Inputs Y,F,R,P,H,L,M,N,A,B,C,Q  
 Input rotational symmetry

0240 096 LABEL  
 0241 089 Y  
 0242 107 STO MEM  
 0243 056 8  
 0244 057 9  
 0245 119 print  
 0246 002 HALT  
 0247 048 0  
 Furnace degrees Kelvin  
 0288 096 LABEL  
 0289 070 F  
 0290 107 STO MEM  
 0291 048 0  
 0292 049 1  
 0293 119 print  
 0294 002 HALT  
 0295 048 0

Temperature of refrigerator  
 0336 096 LABEL  
 0337 082 R  
 0338 107 STO MEM  
 0339 048 0  
 0340 050 2  
 0341 119 print  
 0342 002 HALT  
 0343 048 0

Pressure in atm  
 0384 096 LABEL  
 0385 080 P  
 0386 107 STO MEM  
 0387 048 0  
 0388 051 3  
 0389 119 print  
 0390 002 HALT  
 0391 048 0

Stow heat capacity Cv/R  
 0432 096 LABEL  
 0433 072 H  
 0434 107 STO MEM  
 0435 048 0  
 0436 052 4  
 0437 119 print  
 0438 002 HALT  
 0439 048 0

Atom mass H1 polyatomic  
 0480 096 LABEL  
 0481 076 L  
 0482 107 STO MEM  
 0483 048 0

0484 055 7  
 0485 119 print  
 0486 002 HALT  
 Atom monatomic Ar, or M1 or central M  
 0527 096 LABEL  
 0528 077 M  
 0529 107 STO MEM  
 0530 048 0  
 0531 053 5  
 0532 119 print  
 0533 002 HALT  
 0534 048 0  
 Stow molecular mass 2 N or O  
 0575 096 LABEL  
 0576 078 N  
 0577 107 STO MEM  
 0578 049 1  
 0579 053 5  
 0580 119 print  
 0581 002 HALT  
 0582 048 0  
 Bond length diatomic  
 0623 096 LABEL  
 0624 090 Z  
 0625 107 STO MEM  
 0626 049 1  
 0627 054 6  
 0628 119 print  
 0629 002 HALT  
 0630 048 0  
 Moment 1 polyatomic  
 0671 096 LABEL  
 0672 065 A  
 0673 107 STO MEM  
 0674 048 0  
 0675 056 8  
 0676 119 print  
 0677 002 HALT  
 Moment 2 polyatomic  
 0718 096 LABEL  
 0719 066 B  
 0720 107 STO MEM  
 0721 048 0  
 0722 057 9  
 0723 119 print  
 0724 002 HALT  
 Stow moment 3 polyatomic  
 0765 096 LABEL  
 0766 067 C  
 0767 107 STO MEM  
 0768 049 1  
 0769 048 0  
 0770 119 print  
 0771 002 HALT  
 Input source heat  $nkT=Qf$  ergs/molecule

CARNOTB Carnot Cycle Ar N2 H2O  
 Corrected 26 Aug 2022, for use of Zt  
 Estimates ratios frequency w/w, radii  
 Estimates  $\theta$ , hv, v, wavelength in cycl  
 Inputs Y,F,R,P,H,L,M,N,A,B,C,Q  
 Input rotational symmetry

0240 096 LABEL  
 0241 089 Y  
 0242 107 STO MEM  
 0243 056 8  
 0244 057 9  
 0245 119 print  
 0246 002 HALT  
 0247 048 0

Furnace degrees Kelvin

0288 096 LABEL  
 0289 070 F  
 0290 107 STO MEM  
 0291 048 0  
 0292 049 1  
 0293 119 print  
 0294 002 HALT  
 0295 048 0

Temperature of refrigerator

0336 096 LABEL  
 0337 082 R  
 0338 107 STO MEM  
 0339 048 0  
 0340 050 2  
 0341 119 print  
 0342 002 HALT  
 0343 048 0

Pressure in atm

0384 096 LABEL  
 0385 080 P  
 0386 107 STO MEM  
 0387 048 0  
 0388 051 3  
 0389 119 print  
 0390 002 HALT  
 0391 048 0

Stow heat capacity Cv/R

0432 096 LABEL  
 0433 072 H  
 0434 107 STO MEM  
 0435 048 0  
 0436 052 4  
 0437 119 print  
 0438 002 HALT  
 0439 048 0

Atom mass H1 polyatomic

0480 096 LABEL  
 0481 076 L  
 0482 107 STO MEM  
 0483 048 0

0484 055 7  
 0485 119 print  
 0486 002 HALT  
 Atom monatomic Ar, or M1 or central M  
 0527 096 LABEL  
 0528 077 M  
 0529 107 STO MEM  
 0530 048 0  
 0531 053 5  
 0532 119 print  
 0533 002 HALT  
 0534 048 0

Stow molecular mass 2 N or O

0575 096 LABEL  
 0576 078 N  
 0577 107 STO MEM  
 0578 049 1  
 0579 053 5  
 0580 119 print  
 0581 002 HALT  
 0582 048 0

Bond length diatomic

0623 096 LABEL  
 0624 090 Z  
 0625 107 STO MEM  
 0626 049 1  
 0627 054 6  
 0628 119 print  
 0629 002 HALT  
 0630 048 0

Moment 1 polyatomic

0671 096 LABEL  
 0672 065 A  
 0673 107 STO MEM  
 0674 048 0  
 0675 056 8  
 0676 119 print  
 0677 002 HALT

Moment 2 polyatomic

0718 096 LABEL  
 0719 066 B  
 0720 107 STO MEM  
 0721 048 0  
 0722 057 9  
 0723 119 print  
 0724 002 HALT

Stow moment 3 polyatomic

0765 096 LABEL  
 0766 067 C  
 0767 107 STO MEM  
 0768 049 1  
 0769 048 0  
 0770 119 print  
 0771 002 HALT

Input source heat nkT=Qf ergs/molecule



|                                |                                   |     |         |
|--------------------------------|-----------------------------------|-----|---------|
| Input q for nkT1 as n          | 1067                              | 056 | 8       |
| 0852 096 LABEL                 | 1068                              | 119 | print   |
| 0853 081 Q                     | Input mass H atom                 |     |         |
| 0854 107 STO MEM               | 1109                              | 049 | 1       |
| 0855 048 0                     | 1110                              | 046 | .       |
| 0856 054 6                     | 1111                              | 054 | 6       |
| 0857 119 print                 | 1112                              | 055 | 7       |
| 0858 002 HALT                  | 1113                              | 050 | 2       |
| Execute <SH>X                  | 1114                              | 054 | 6       |
| 0899 096 LABEL                 | 1115                              | 049 | 1       |
| 0900 088 X                     | 1116                              | 052 | 4       |
| 0901 049 1                     | 1117                              | 101 | EE      |
| 0902 048 0                     | 1118                              | 050 | 2       |
| 0903 046 .                     | 1119                              | 052 | 4       |
| 0904 050 2                     | 1120                              | 111 | +/-     |
| 0905 050 2                     | 1121                              | 107 | STO MEM |
| 0906 057 9                     | 1122                              | 057 | 9       |
| 0907 054 6                     | 1123                              | 054 | 6       |
| 0908 055 7                     | 1124                              | 119 | print   |
| 0909 050 2                     | Input c speed light               |     |         |
| 0910 119 print                 | 1165                              | 050 | 2       |
| Stow Zt translational symmetry | 1166                              | 046 | .       |
| Zt = 2^3xrms v/mean v in r99   | 1167                              | 057 | 9       |
| 0991 107 STO MEM               | 1168                              | 057 | 9       |
| 0992 057 9                     | 1169                              | 055 | 7       |
| 0993 057 9                     | 1170                              | 057 | 9       |
| Input Boltzmann's k            | 1171                              | 050 | 2       |
| 1034 049 1                     | 1172                              | 052 | 4       |
| 1035 046 .                     | 1173                              | 053 | 5       |
| 1036 051 3                     | 1174                              | 056 | 8       |
| 1037 056 8                     | 1175                              | 101 | EE      |
| 1038 048 0                     | 1176                              | 049 | 1       |
| 1039 054 6                     | 1177                              | 048 | 0       |
| 1040 050 2                     | 1178                              | 107 | STO MEM |
| 1041 053 5                     | 1179                              | 057 | 9       |
| 1042 057 9                     | 1180                              | 053 | 5       |
| 1043 101 EE                    | Recall pressure1 and calculate r1 |     |         |
| 1044 049 1                     | $r1^3 = (T1p2r2^3)/T2p1$          |     |         |
| 1045 054 6                     | 1261                              | 040 | (       |
| 1046 111 +/-                   | 1262                              | 109 | RCL MEM |
| 1047 107 STO MEM               | 1263                              | 048 | 0       |
| 1048 057 9                     | 1264                              | 049 | 1       |
| 1049 055 7                     | 1265                              | 047 | /       |
| 1050 119 print                 | 1266                              | 050 | 2       |
| 1051 049 1                     | 1267                              | 057 | 9       |
| 1052 046 .                     | 1268                              | 056 | 8       |
| 1053 048 0                     | 1269                              | 046 | .       |
| 1054 053 5                     | 1270                              | 049 | 1       |
| 1055 052 4                     | 1271                              | 053 | 5       |
| 1056 053 5                     | 1272                              | 041 | )       |
| 1057 057 9                     | 1273                              | 047 | /       |
| 1058 049 1                     | 1274                              | 109 | RCL MEM |
| 1059 056 8                     | 1275                              | 048 | 0       |
| 1060 053 5                     | 1276                              | 051 | 3       |
| 1061 101 EE                    | 1277                              | 061 | =       |
| 1062 050 2                     | 1278                              | 092 | Root    |
| 1063 055 7                     | 1279                              | 051 | 3       |
| 1064 111 +/-                   | 1280                              | 042 | x       |
| 1065 107 STO MEM               | Input r2 at 1 atm and 298.15K     |     |         |
| 1066 057 9                     | 1321                              | 049 | 1       |

```

1322 046 .
1323 054 6
1324 057 9
1325 057 9
1326 054 6
1327 052 4
1328 101 EE
1329 055 7
1330 111 +/-
1331 041 )
1332 119 print
Store r1 radial separation
1373 107 STO MEM
1374 057 9
1375 048 0

```

Go to LABEL 5

1416 083 S  
Subroutine snTn entropic energy n=1-4

```

1457 096 LABEL
1458 068 D
1459 040 (
1460 040 (
1461 040 (
1462 109 RCL MEM
1463 048 0
1464 053 5
1465 043 +
1466 109 RCL MEM
1467 049 1
1468 053 5
1469 041 )
1470 042 x
1471 109 RCL MEM
1472 057 9
1473 054 6
1474 041 )

```

Print mass

```

1515 119 print
1516 107 STO MEM
1517 056 8
1518 052 4
1519 042 x
1520 040 (
1521 109 RCL MEM
1522 053 5
1523 048 0
1524 113 Square
1525 041 )
1526 061 =

```

Print In moment of inertia  $mr^2$

```

1567 119 print
1568 042 x
1569 051 3
1570 042 x
1571 109 RCL MEM
1572 057 9
1573 055 7
1574 042 x

```

Recall temperature r51  
1615 109 RCL MEM

```

1616 053 5
1617 049 1
1618 041 )
1619 061 =

```

Print  $3kTnIn=\theta tn^2$  uncorrected

```

1660 119 print
1661 092 Root
1662 050 2
1663 047 /
1664 040 (
1665 109 RCL MEM
1666 057 9
1667 057 9
1668 092 Root
1669 051 3
1670 041 )
1671 061 =

```

Print  $\theta tn$  translational action 1-D

```

1712 119 print
1713 107 STO MEM
1714 056 8
1715 053 5
1716 047 /
1717 109 RCL MEM
1718 057 9
1719 056 8
1720 061 =

```

Print quantum number

```

1761 119 print
1762 107 STO MEM
1763 052 4
1764 048 0
1765 121 Cube
1766 110 LOG e
1767 042 x
1768 109 RCL MEM
1769 057 9
1770 055 7
1771 061 =

```

Print translational  $-gt/T$  Gibbs/K

```

1812 119 print
1813 107 STO MEM
1814 055 7
1815 048 0
1816 042 x
1817 109 RCL MEM
1818 053 5
1819 049 1

```

Print  $kTnln[\theta nt/h-)^3/zt]= -gtn$

```

1860 061 =
1861 119 print
1862 107 STO MEM
1863 055 7
1864 049 1
1865 043 +
1866 040 (
1867 109 RCL MEM
1868 048 0
1869 052 4
1870 042 x

```



|                                     |     |         |                                        |
|-------------------------------------|-----|---------|----------------------------------------|
| 1871                                | 109 | RCL MEM | Print virtual translational freq v     |
| 1872                                | 057 | 9       | 2127 119 print                         |
| 1873                                | 055 | 7       | 2128 107 STO MEM                       |
| 1874                                | 042 | x       | 2129 056 8                             |
| 1875                                | 109 | RCL MEM | 2130 051 3                             |
| 1876                                | 053 | 5       | 2131 114 1/x                           |
| 1877                                | 049 | 1       | 2132 042 x                             |
| 1878                                | 041 | )       | 2133 109 RCL MEM                       |
| 1879                                | 061 | =       | 2134 057 9                             |
| 1880                                | 119 | print   | 2135 053 5                             |
| Print stnTn for gas entropic energy |     |         | 2136 041 )                             |
| 1921                                | 107 | STO MEM | Print wavelength virtual trans. quanta |
| 1922                                | 056 | 8       | 2177 119 print                         |
| 1923                                | 048 | 0       | 2178 107 STO MEM                       |
| 1924                                | 047 | /       | 2179 048 0                             |
| 1925                                | 109 | RCL MEM | 2180 048 0                             |
| 1926                                | 053 | 5       | 2181 040 (                             |
| 1927                                | 049 | 1       | 2182 109 RCL MEM                       |
| 1928                                | 061 | =       | 2183 048 0                             |
| Print stn                           |     |         | 2184 048 0                             |
| 1969                                | 119 | print   | 2185 047 /                             |
| 1970                                | 107 | STO MEM | 2186 109 RCL MEM                       |
| 1971                                | 056 | 8       | 2187 053 5                             |
| 1972                                | 049 | 1       | 2188 048 0                             |
| 1973                                | 040 | (       | 2189 041 )                             |
| 1974                                | 040 | (       | Print lambda/r                         |
| 1975                                | 109 | RCL MEM | 2230 119 print                         |
| 1976                                | 055 | 7       | 2231 107 STO MEM                       |
| 1977                                | 049 | 1       | 2232 052 4                             |
| 1978                                | 041 | )       | 2233 051 3                             |
| 1979                                | 047 | /       | 2234 040 (                             |
| 1980                                | 109 | RCL MEM | 2235 109 RCL MEM                       |
| 1981                                | 053 | 5       | 2236 052 4                             |
| 1982                                | 048 | 0       | 2237 051 3                             |
| 1983                                | 121 | Cube    | 2238 047 /                             |
| 1984                                | 047 | /       | 2239 040 (                             |
| 1985                                | 056 | 8       | 2240 050 2                             |
| 1986                                | 041 | )       | 2241 042 x                             |
| Print virtual pressure gt/a^3       |     |         | 2242 112 pi                            |
| 2027                                | 119 | print   | 2243 041 )                             |
| 2028                                | 040 | (       | 2244 041 )                             |
| 2029                                | 109 | RCL MEM | Print lambda/2pir                      |
| 2030                                | 055 | 7       | 2285 119 print                         |
| 2031                                | 049 | 1       | Estimate frequency ratio v/w           |
| 2032                                | 047 | /       | 2326 040 (                             |
| 2033                                | 109 | RCL MEM | 2327 040 (                             |
| 2034                                | 052 | 4       | 2328 040 (                             |
| 2035                                | 048 | 0       | 2329 040 (                             |
| 2036                                | 041 | )       | 2330 040 (                             |
| Print virtual hv=gt/nt              |     |         | 2331 040 (                             |
| 2077                                | 119 | print   | 2332 109 RCL MEM                       |
| 2078                                | 047 | /       | 2333 056 8                             |
| 2079                                | 109 | RCL MEM | 2334 053 5                             |
| 2080                                | 057 | 9       | 2335 042 x                             |
| 2081                                | 056 | 8       | 2336 109 RCL MEM                       |
| 2082                                | 047 | /       | 2337 057 9                             |
| 2083                                | 050 | 2       | 2338 057 9                             |
| 2084                                | 047 | /       | 2339 064 Inverse                       |
| 2085                                | 112 | pi      | 2340 121 Cube                          |
| 2086                                | 041 | )       | 2341 041 )                             |

Print mrv without Zt<sup>1/3</sup> correction

```
2382 119 print
2383 041 )
2384 047 /
2385 109 RCL MEM
2386 056 8
2387 052 4
```

Print rv

```
2428 041 )
2429 119 print
2430 047 /
2431 109 RCL MEM
2432 053 5
2433 048 0
2434 041 )
```

Print v

```
2475 119 print
2476 047 /
2477 109 RCL MEM
2478 053 5
2479 048 0
```

Print w

```
2520 041 )
2521 119 print
2522 114 1/x
2523 042 x
2524 109 RCL MEM
2525 056 8
2526 051 3
2527 041 )
```

Print v/w

```
2568 119 print
Test if diatomic
2609 109 RCL MEM
2610 049 1
2611 053 5
2612 038 If zero
2613 084 T
Test if triatomic H2O
2654 109 RCL MEM
2655 048 0
2656 056 8
2657 038 If zero
2658 069 E
```

Test if non-linear

```
2699 040 (
2700 048 0
2701 045 -
2702 109 RCL MEM
2703 049 1
2704 050 2
2705 041 )
2706 064 Inverse
2707 037 If pos
2708 116 Tangent
```

Calculate Sr for water

$Sr = R \ln[\pi / (2e^{3/2} a^2 b^2 c / h^{-3/z})]$

Calculate @rA

```
2829 096 LABEL
2830 116 Tangent
```

```
2831 040 (
2832 109 RCL MEM
2833 048 0
2834 056 8
2835 042 x
2836 109 RCL MEM
2837 053 5
2838 049 1
```

```
2839 042 x
2840 050 2
2841 042 x
2842 109 RCL MEM
2843 057 9
2844 055 7
2845 041 )
```

2846 064 Inverse

2847 113 Square

2848 061 =

Print, stow @rA in r17

```
2889 119 print
2890 107 STO MEM
2891 049 1
2892 055 7
2893 109 RCL MEM
2894 049 1
2895 055 7
2896 047 /
```

Recall h-

```
2937 109 RCL MEM
2938 057 9
2939 056 8
2940 061 =
```

Print, stow @rA/h- in r17

```
2981 119 print
2982 107 STO MEM
2983 049 1
2984 055 7
```

Calculate @rB

```
3025 109 RCL MEM
3026 048 0
3027 057 9
3028 042 x
3029 109 RCL MEM
3030 053 5
3031 049 1
3032 042 x
3033 050 2
```

Recall k

```
3074 042 x
3075 109 RCL MEM
3076 057 9
3077 055 7
3078 041 )
3079 092 Root
3080 050 2
3081 061 =
```

Print, stow @rB in r18

```
3122 119 print
3123 107 STO MEM
3124 049 1
```



|                           |     |         |  |                          |     |         |
|---------------------------|-----|---------|--|--------------------------|-----|---------|
| 3125                      | 056 | 8       |  | 3497                     | 055 | 7       |
| 3126                      | 109 | RCL MEM |  | 3498                     | 042 | x       |
| 3127                      | 049 | 1       |  | 3499                     | 109 | RCL MEM |
| 3128                      | 056 | 8       |  | 3500                     | 049 | 1       |
| 3129                      | 047 | /       |  | 3501                     | 056 | 8       |
| Recall h-                 |     |         |  | 3502                     | 042 | x       |
| 3170                      | 109 | RCL MEM |  | 3503                     | 109 | RCL MEM |
| 3171                      | 057 | 9       |  | 3504                     | 049 | 1       |
| 3172                      | 056 | 8       |  | 3505                     | 057 | 9       |
| 3173                      | 061 | =       |  | 3506                     | 041 | )       |
| Print, stow @rB/h- in r18 |     |         |  | Print jrA x jrB x jrC    |     |         |
| 3214                      | 119 | print   |  | 3547                     | 119 | print   |
| 3215                      | 107 | STO MEM |  | Recall symmetry factor   |     |         |
| 3216                      | 049 | 1       |  | 3588                     | 042 | x       |
| 3217                      | 056 | 8       |  | 3589                     | 040 | (       |
| 3218                      | 061 | =       |  | 3590                     | 112 | pi      |
| Calculate @rC             |     |         |  | 3591                     | 064 | Inverse |
| 3259                      | 040 | (       |  | 3592                     | 113 | Square  |
| 3260                      | 109 | RCL MEM |  | 3593                     | 041 | )       |
| 3261                      | 049 | 1       |  | 3594                     | 041 | )       |
| 3262                      | 048 | 0       |  | Print corrected jrcubed  |     |         |
| 3263                      | 042 | x       |  | 3635                     | 119 | print   |
| 3264                      | 109 | RCL MEM |  | 3636                     | 107 | STO MEM |
| 3265                      | 053 | 5       |  | 3637                     | 054 | 6       |
| 3266                      | 049 | 1       |  | 3638                     | 049 | 1       |
| 3267                      | 042 | x       |  | 3639                     | 040 | (       |
| 3268                      | 050 | 2       |  | 3640                     | 109 | RCL MEM |
| 3269                      | 042 | x       |  | 3641                     | 054 | 6       |
| Recall k                  |     |         |  | 3642                     | 049 | 1       |
| 3310                      | 109 | RCL MEM |  | 3643                     | 047 | /       |
| 3311                      | 057 | 9       |  | 3644                     | 109 | RCL MEM |
| 3312                      | 055 | 7       |  | 3645                     | 056 | 8       |
| 3313                      | 041 | )       |  | 3646                     | 057 | 9       |
| 3314                      | 092 | Root    |  | 3647                     | 041 | )       |
| 3315                      | 050 | 2       |  | 3648                     | 110 | LOG e   |
| 3316                      | 061 | =       |  | 3649                     | 042 | x       |
| Print, stow @rC in r19    |     |         |  | Recall k                 |     |         |
| 3357                      | 119 | print   |  | 3690                     | 109 | RCL MEM |
| 3358                      | 107 | STO MEM |  | 3691                     | 057 | 9       |
| 3359                      | 049 | 1       |  | 3692                     | 055 | 7       |
| 3360                      | 057 | 9       |  | 3693                     | 061 | =       |
| 3361                      | 109 | RCL MEM |  | Print, stow -gr/T in r72 |     |         |
| 3362                      | 049 | 1       |  | 3734                     | 119 | print   |
| 3363                      | 057 | 9       |  | 3735                     | 107 | STO MEM |
| 3364                      | 047 | /       |  | 3736                     | 055 | 7       |
| Recall h-                 |     |         |  | 3737                     | 050 | 2       |
| 3405                      | 109 | RCL MEM |  | 3738                     | 119 | print   |
| 3406                      | 057 | 9       |  | 3739                     | 042 | x       |
| 3407                      | 056 | 8       |  | 3740                     | 109 | RCL MEM |
| 3408                      | 061 | =       |  | 3741                     | 053 | 5       |
| Print, stow @rC/h-        |     |         |  | 3742                     | 049 | 1       |
| 3449                      | 119 | print   |  | 3743                     | 061 | =       |
| 3450                      | 107 | STO MEM |  | Print -gr                |     |         |
| 3451                      | 049 | 1       |  | 3784                     | 119 | print   |
| 3452                      | 057 | 9       |  | 3785                     | 107 | STO MEM |
| jrXjrXjr                  |     |         |  | 3786                     | 055 | 7       |
| 3493                      | 040 | (       |  | 3787                     | 051 | 3       |
| 3494                      | 040 | (       |  | 3788                     | 040 | (       |
| 3495                      | 109 | RCL MEM |  | 3789                     | 109 | RCL MEM |
| 3496                      | 049 | 1       |  | 3790                     | 055 | 7       |

```

3791 049 1
3792 043 +
3793 109 RCL MEM
3794 055 7
3795 051 3
3796 041 )
3797 061 =

```

Print -gt -gr

```

3838 119 print
3839 107 STO MEM
3840 055 7
3841 052 4
3842 047 /
3843 109 RCL MEM
3844 053 5
3845 049 1
3846 061 =

```

Print -grn/Tn - gtn/Tn

```

3887 119 print
3888 107 STO MEM
3889 055 7
3890 053 5
3891 040 (
3892 109 RCL MEM
3893 056 8
3894 048 0
3895 043 +
3896 109 RCL MEM
3897 055 7
3898 051 3
3899 041 )

```

Print total snTn

```

3940 119 print
3941 107 STO MEM
3942 056 8
3943 050 2
3944 047 /
3945 109 RCL MEM
3946 053 5
3947 049 1
3948 061 =

```

Print stn + Srn

```

3989 119 print
3990 040 (
3991 109 RCL MEM
3992 055 7
3993 051 3
3994 047 /
3995 109 RCL MEM
3996 054 6
3997 049 1
3998 041 )
3999 061 =

```

Print virtual hvr

```

4040 119 print
4041 047 /
4042 109 RCL MEM
4043 057 9
4044 056 8
4045 047 /

```

```

4046 050 2
4047 047 /
4048 112 pi
4049 061 =

```

Print vr

```

4090 119 print
4091 114 1/x
4092 042 x
4093 109 RCL MEM
4094 057 9
4095 053 5
4096 061 =

```

Print virtual rotational wavelength

```

4137 119 print
4138 063 Goto
4139 084 T

```

Calculate rotational quantum no.

```

4180 096 LABEL
4181 069 E
4182 109 RCL MEM
4183 048 0
4184 053 5
4185 042 x
4186 109 RCL MEM
4187 049 1
4188 053 5
4189 041 )
4190 047 /
4191 040 (
4192 109 RCL MEM
4193 048 0
4194 053 5
4195 043 +
4196 109 RCL MEM
4197 049 1
4198 053 5
4199 041 )
4200 042 x

```

Recall H atom mass

```

4241 109 RCL MEM
4242 057 9
4243 054 6
4244 042 x
4245 040 (
4246 109 RCL MEM
4247 049 1
4248 054 6
4249 113 Square
4250 041 )
4251 061 =

```

Print Ir

```

4292 119 print
4293 042 x
4294 040 (
4295 050 2
4296 042 x
4297 109 RCL MEM
4298 057 9
4299 055 7
4300 042 x

```



|                            |     |         |
|----------------------------|-----|---------|
| 4301                       | 109 | RCL MEM |
| 4302                       | 053 | 5       |
| 4303                       | 049 | 1       |
| 4304                       | 041 | )       |
| 4305                       | 061 | =       |
| 4306                       | 047 | /       |
| 4307                       | 109 | RCL MEM |
| 4308                       | 056 | 8       |
| 4309                       | 057 | 9       |
| 4310                       | 061 | =       |
| Print @r^2                 |     |         |
| 4351                       | 119 | print   |
| 4352                       | 064 | Inverse |
| 4353                       | 113 | Square  |
| 4354                       | 061 | =       |
| Print @r rotational action |     |         |
| 4395                       | 119 | print   |
| 4396                       | 047 | /       |
| 4397                       | 109 | RCL MEM |
| 4398                       | 057 | 9       |
| 4399                       | 056 | 8       |
| 4400                       | 061 | =       |
| Print jr                   |     |         |
| 4441                       | 119 | print   |
| 4442                       | 107 | STO MEM |
| 4443                       | 052 | 4       |
| 4444                       | 049 | 1       |
| 4445                       | 109 | RCL MEM |
| 4446                       | 052 | 4       |
| 4447                       | 049 | 1       |
| 4448                       | 110 | LOG e   |
| 4449                       | 042 | x       |
| 4450                       | 109 | RCL MEM |
| 4451                       | 057 | 9       |
| 4452                       | 055 | 7       |
| 4453                       | 042 | x       |
| 4454                       | 050 | 2       |
| 4455                       | 061 | =       |
| Print rotational -gr/T     |     |         |
| 4496                       | 107 | STO MEM |
| 4497                       | 055 | 7       |
| 4498                       | 050 | 2       |
| 4499                       | 119 | print   |
| 4500                       | 042 | x       |
| 4501                       | 109 | RCL MEM |
| 4502                       | 053 | 5       |
| 4503                       | 049 | 1       |
| 4504                       | 061 | =       |
| Print -gr                  |     |         |
| 4545                       | 119 | print   |
| 4546                       | 107 | STO MEM |
| 4547                       | 055 | 7       |
| 4548                       | 051 | 3       |
| 4549                       | 040 | (       |
| 4550                       | 109 | RCL MEM |
| 4551                       | 055 | 7       |
| 4552                       | 049 | 1       |
| 4553                       | 043 | +       |
| 4554                       | 109 | RCL MEM |
| 4555                       | 055 | 7       |

|                        |     |         |
|------------------------|-----|---------|
| 4556                   | 051 | 3       |
| 4557                   | 041 | )       |
| 4558                   | 061 | =       |
| Print total -gt - gr   |     |         |
| 4599                   | 119 | print   |
| 4600                   | 107 | STO MEM |
| 4601                   | 055 | 7       |
| 4602                   | 052 | 4       |
| 4603                   | 047 | /       |
| 4604                   | 109 | RCL MEM |
| 4605                   | 053 | 5       |
| 4606                   | 049 | 1       |
| 4607                   | 061 | =       |
| Print -grn/Tn - gtn/Tn |     |         |
| 4648                   | 119 | print   |
| 4649                   | 107 | STO MEM |
| 4650                   | 055 | 7       |
| 4651                   | 053 | 5       |
| 4652                   | 040 | (       |
| 4653                   | 109 | RCL MEM |
| 4654                   | 056 | 8       |
| 4655                   | 048 | 0       |
| 4656                   | 043 | +       |
| 4657                   | 109 | RCL MEM |
| 4658                   | 055 | 7       |
| 4659                   | 051 | 3       |
| 4660                   | 041 | )       |
| Print Total snTn       |     |         |
| 4701                   | 107 | STO MEM |
| 4702                   | 056 | 8       |
| 4703                   | 050 | 2       |
| 4704                   | 119 | print   |
| 4705                   | 047 | /       |
| 4706                   | 109 | RCL MEM |
| 4707                   | 053 | 5       |
| 4708                   | 049 | 1       |
| 4709                   | 061 | =       |
| Print stn+srn          |     |         |
| 4750                   | 119 | print   |
| 4751                   | 040 | (       |
| 4752                   | 109 | RCL MEM |
| 4753                   | 055 | 7       |
| 4754                   | 051 | 3       |
| 4755                   | 047 | /       |
| 4756                   | 109 | RCL MEM |
| 4757                   | 052 | 4       |
| 4758                   | 049 | 1       |
| 4759                   | 041 | )       |
| 4760                   | 061 | =       |
| Print virtual hvr      |     |         |
| 4801                   | 119 | print   |
| 4802                   | 047 | /       |
| 4803                   | 109 | RCL MEM |
| 4804                   | 057 | 9       |
| 4805                   | 056 | 8       |
| 4806                   | 047 | /       |
| 4807                   | 050 | 2       |
| 4808                   | 047 | /       |
| 4809                   | 112 | pi      |
| 4810                   | 061 | =       |

```

Print vr
4851 119 print
4852 114 1/x
4853 042 x
4854 109 RCL MEM
4855 057 9
4856 053 5
4857 061 =
Print virtual rotational wavelength
4898 119 print
4899 040 (
4900 109 RCL MEM
4901 052 4
4902 048 0
4903 121 Cube
4904 042 x
4905 109 RCL MEM
4906 052 4
4907 049 1
4908 113 Square
4909 041 )
Print nt^3xjr^2
4950 119 print
4951 096 LABEL
4952 084 T
4953 040 (
4954 109 RCL MEM
4955 053 5
4956 048 0
4957 121 Cube
4958 042 x
4959 056 8
4960 041 )
Print vn
5001 119 print
5002 107 STO MEM
5003 054 6
5004 048 0
5005 040 (
5006 109 RCL MEM
5007 055 7
5008 049 1
5009 047 /
5010 109 RCL MEM
5011 054 6
5012 048 0
5013 041 )
Print -gt/a^3 density Gibbs
5054 119 print
5055 107 STO MEM
5056 052 4
5057 053 5
5058 040 (
5059 109 RCL MEM
5060 055 7
5061 052 4
5062 047 /
5063 109 RCL MEM
5064 054 6
5065 048 0

5066 041 )
Print -gt+-gr/a^3 Gibbs density
5107 119 print
5108 040 (
5109 109 RCL MEM
5110 057 9
5111 055 7
5112 042 x
5113 109 RCL MEM
5114 053 5
5115 049 1
5116 041 )
5117 047 /
5118 040 (
5119 109 RCL MEM
5120 053 5
5121 048 0
5122 121 Cube
5123 041 )
5124 047 /
5125 056 8
5126 061 =
Print pressure pn
5167 119 print
5168 107 STO MEM
5169 052 4
5170 054 6
5171 042 x
5172 109 RCL MEM
5173 054 6
5174 048 0
5175 061 =
Print pnv
5216 119 print
5217 047 /
5218 109 RCL MEM
5219 053 5
5220 049 1
5221 061 =
Print pnv/Tn
5262 119 print
5263 040 (
5264 109 RCL MEM
5265 052 4
5266 053 5
5267 047 /
5268 109 RCL MEM
5269 052 4
5270 054 6
5271 041 )
Print quantum p vs. molecular pressure
5312 119 print
5313 060 Return
Set up V values
5354 096 LABEL
5355 083 S
Calculate q1 source heat/molecule
5396 040 (
Input n for Qs
5437 109 RCL MEM

```



|                               |     |          |
|-------------------------------|-----|----------|
| 5438                          | 048 | 0        |
| 5439                          | 054 | 6        |
| 5440                          | 042 | x        |
| 5441                          | 109 | RCL MEM  |
| 5442                          | 057 | 9        |
| 5443                          | 055 | 7        |
| 5444                          | 042 | x        |
| 5445                          | 109 | RCL MEM  |
| 5446                          | 048 | 0        |
| 5447                          | 049 | 1        |
| 5448                          | 041 | )        |
| Print Qf                      |     |          |
| 5489                          | 119 | print    |
| 5490                          | 047 | /        |
| 5491                          | 109 | RCL MEM  |
| 5492                          | 048 | 0        |
| 5493                          | 049 | 1        |
| 5494                          | 061 | =        |
| Print ds/molecule=ln(V2/V1)   |     |          |
| 5535                          | 119 | print    |
| 5536                          | 047 | /        |
| 5537                          | 109 | RCL MEM  |
| 5538                          | 057 | 9        |
| 5539                          | 055 | 7        |
| 5540                          | 061 | =        |
| 5541                          | 064 | Inverse  |
| 5542                          | 110 | LOG e    |
| 5543                          | 061 | =        |
| Print V2/V1 = V3/V4           |     |          |
| 5584                          | 119 | print    |
| 5585                          | 107 | STO MEM  |
| 5586                          | 053 | 5        |
| 5587                          | 051 | 3        |
| Calculate V2/V3=(Tr/Ts)^Cv/nR |     |          |
| 5628                          | 040 | (        |
| 5629                          | 109 | RCL MEM  |
| 5630                          | 048 | 0        |
| 5631                          | 050 | 2        |
| 5632                          | 047 | /        |
| 5633                          | 109 | RCL MEM  |
| 5634                          | 048 | 0        |
| 5635                          | 049 | 1        |
| 5636                          | 041 | )        |
| 5637                          | 091 | Exponent |
| 5638                          | 109 | RCL MEM  |
| 5639                          | 048 | 0        |
| 5640                          | 052 | 4        |
| 5641                          | 061 | =        |
| Print V2/V3                   |     |          |
| 5682                          | 119 | print    |
| 5683                          | 114 | 1/x      |
| 5684                          | 042 | x        |
| 5685                          | 109 | RCL MEM  |
| 5686                          | 053 | 5        |
| 5687                          | 051 | 3        |
| 5688                          | 061 | =        |
| Print V3/V1                   |     |          |
| 5729                          | 119 | print    |
| 5730                          | 107 | STO MEM  |
| 5731                          | 053 | 5        |

|                          |     |         |
|--------------------------|-----|---------|
| 5732                     | 052 | 4       |
| Calculate SIT1           |     |         |
| 5773                     | 109 | RCL MEM |
| 5774                     | 048 | 0       |
| 5775                     | 049 | 1       |
| 5776                     | 107 | STO MEM |
| 5777                     | 053 | 5       |
| 5778                     | 049 | 1       |
| 5779                     | 109 | RCL MEM |
| 5780                     | 057 | 9       |
| 5781                     | 048 | 0       |
| 5782                     | 107 | STO MEM |
| 5783                     | 053 | 5       |
| 5784                     | 048 | 0       |
| Go to Label D and return |     |         |
| 5825                     | 068 | D       |
| 5826                     | 109 | RCL MEM |
| 5827                     | 053 | 5       |
| 5828                     | 051 | 3       |
| 5829                     | 064 | Inverse |
| 5830                     | 121 | Cube    |
| 5831                     | 042 | x       |
| 5832                     | 109 | RCL MEM |
| 5833                     | 057 | 9       |
| 5834                     | 048 | 0       |
| 5835                     | 061 | =       |
| Print r2                 |     |         |
| 5876                     | 119 | print   |
| 5877                     | 107 | STO MEM |
| 5878                     | 053 | 5       |
| 5879                     | 048 | 0       |
| 5880                     | 068 | D       |
| 5881                     | 109 | RCL MEM |
| 5882                     | 053 | 5       |
| 5883                     | 052 | 4       |
| 5884                     | 064 | Inverse |
| 5885                     | 121 | Cube    |
| 5886                     | 042 | x       |
| 5887                     | 109 | RCL MEM |
| 5888                     | 057 | 9       |
| 5889                     | 048 | 0       |
| 5890                     | 061 | =       |
| Print r3                 |     |         |
| 5931                     | 119 | print   |
| 5932                     | 107 | STO MEM |
| 5933                     | 053 | 5       |
| 5934                     | 048 | 0       |
| 5935                     | 109 | RCL MEM |
| 5936                     | 048 | 0       |
| 5937                     | 050 | 2       |
| 5938                     | 107 | STO MEM |
| 5939                     | 053 | 5       |
| 5940                     | 049 | 1       |
| 5941                     | 068 | D       |
| 5942                     | 109 | RCL MEM |
| 5943                     | 053 | 5       |
| 5944                     | 048 | 0       |
| 5945                     | 121 | Cube    |
| 5946                     | 042 | x       |
| 5947                     | 040 | (       |

|      |     |         |          |     |         |
|------|-----|---------|----------|-----|---------|
| 5948 | 109 | RCL MEM | 5956     | 061 | =       |
| 5949 | 053 | 5       | Print r4 |     |         |
| 5950 | 051 | 3       | 5997     | 119 | print   |
| 5951 | 114 | 1/x     | 5998     | 107 | STO MEM |
| 5952 | 041 | )       | 5999     | 053 | 5       |
| 5953 | 061 | =       | 6000     | 048 | 0       |
| 5954 | 064 | Inverse | 6001     | 068 | D       |
| 5955 | 121 | Cube    | 6002     | 002 | HALT    |

6.4 0002  
2.88 0002  
1.5 0000  
4. 0001  
4. 0001  
1. 0000  
10.229672  
1.3806259 -0016  
1.05459185 -0027  
1.672614 -0024  
6.410895036613 -0008  
8.83600576 -0014  
1.3806259 -0016  
2.718281828459 0000  
3.0186917696247 -0001  
9.0048340006472 0000  
6.690456 -0023  
2.7497489929671 -0037  
7.2890393821235 -0050  
1.2436969770194 -0025 ✓  
1.1793159382176 0002  
1.9757190461663 -0015  
1.2644601895464 -0012  
1.3970002759464 -0012  
2.1828129311663 -0015  
5.9987280574185 0008  
1.0721979993398 -0014  
1.6181199538776 0012  
1.8527208522557 -0002  
2.8899566155345 0005  
4.5995088068344 0004  
2.69982210194 -0025  
4.0353334689593 -0003  
6.2944931182203 0004  
9.8184310962387 0011  
1.6480432953259 0000  
2.1078804997381 -0021  
5.9987280574185 0008  
0. 0000  
4.1918912201607 0007  
8.83600576 -0014  
1.3806259 -0016  
1.4310314228976 0001 ✓  
8.9471247690198 -0008  
6.690456 -0023  
5.3557797179579 -0037  
1.419711013115 -0049  
1.7357189541703 -0025 ✓  
1.6458679764785 0002  
2.1137816361663 -0015  
1.3528202471464 -0012  
1.4853603335464 -0012  
2.3208755211663 -0015  
2.361019785455 0008  
8.2194943123013 -0015  
1.2404544464462 0012  
2.4167953838117 -0002  
2.7011978106979 0005  
4.2990898384158 0004  
3.7679052709895 -0025

Argon

29/8/22



5.6317615286454 -0003  
6.2944931182203 0004  
7.0352133011664 0011  
1.7632080128126 0000  
5.7298132590012 -0021  
2.361019785455 0008  
0. 0000  
1.5421105995242 0007  
8.83600576 -0014  
1.3806259 -0016  
1.5310314228976 0001 ✓  
1.3337586124467 -0007  
6.690456 -0023  
1.1901732706573 -0036  
1.419711013115 -0049  
1.7357189541703 -0025  
1.6458679764785 0002  
2.1137816361663 -0015  
6.0876911121589 -0013  
6.6841215009589 -0013  
2.3208755211663 -0015  
3.2072359474233 0007  
3.6987724405356 -0015  
5.5820450090081 0011  
5.3706564084705 -0002  
4.0267079502627 0005  
6.4087047467175 0004  
3.7679052709895 -0025  
5.6317615286454 -0003  
4.2224743488736 0004  
3.1658459855249 0011  
1.7632080128126 0000  
1.8981113993343 -0020  
3.2072359474233 0007  
0. 0000  
2.0948204585856 0006  
3.976202592 -0014  
1.3806259 -0016  
1.5310314228976 0001 ✓  
9.5567980656551 -0008  
6.690456 -0023  
6.1105533177048 -0037  
7.2890393821235 -0050  
1.2436969770194 -0025 ✓  
1.1793159382176 0002  
1.9757190461663 -0015  
5.6900708529589 -0013  
6.2865012417589 -0013  
2.1828129311663 -0015  
8.1487399568157 0007  
4.824890997029 -0015  
7.2815397924491 0011  
4.1171574494571 -0002  
4.3080929629069 0005  
6.8565429034605 0004  
2.69982210194 -0025  
4.0353334689593 -0003  
4.2224743488736 0004  
4.4182939933074 0011  
1.6480432953259 0000



|                 |       |
|-----------------|-------|
| 6.9827616086823 | -0021 |
| 8.1487399568157 | 0007  |
| 0.              | 0000  |
| 5.6943123864575 | 0006  |
| 3.976202592     | -0014 |
| 1.3806259       | -0016 |
| 1.4310314228976 | 0001  |

---

30/8/22

N<sub>2</sub>

2. 0000  
 6.4 0002  
 2.88 0002  
 4. 0001  
 2.5 0000  
 1.4 0001  
 1.4 0001  
 1.09 -0008  
 1. 0000  
 10.229672  
 1.3806259 -0016  
 1.05459185 -0027  
 1.672614 -0024  
 6.410895036613 -0008  
 8.83600576 -0014  
 1.3806259 -0016  
 2.718281828459 0000  
 1.3584112963311 -0001  
 2.001074222366 0001  
 4.6833192 -0023  
 1.924824295077 -0037  
 5.1023275674865 -0050  
 1.0405515457934 -0025  
 9.8668650416119 0001  
 1.9018538463438 -0015  
 1.2171864616601 -0012  
 1.4380866056601 -0012  
 2.2470103213438 -0015  
 5.7744566725263 0008  
 1.233610124925 -0014  
 1.8617169213854 0012  
 1.6103009783942 -0002  
 2.5118192845112 0005  
 3.9976845528351 0004  
 2.2588332314464 -0025  
 4.8231460103048 -0003  
 7.5233582561554 0004  
 1.1735269745003 0012  
 1.586428741596 0000  
 1.39106288538 -0039  
 1.229143966774 -0052  
 1.1086676538864 -0026  
 1.0512765236014 0001 ✓  
 6.4960940777094 -0016  
 4.157500209734 -0013  
 1.6329364826335 -0012  
 2.5514632541148 -0015  
 1.8538366266335 -0012  
 2.8966197291148 -0015  
 3.9547161155006 -0014  
 5.9683053525124 0012 ✓  
 5.0230750655846 -0003  
 1.0616258779981 0008  
 2.1078804997381 -0021  
 5.7744566725263 0008  
 7.7468171598739 0008  
 4.1918912201607 0007  
 8.83600576 -0014  
 1.3806259 -0016  
 1.3775301813068 0001

8.9471247690198 -0008  
4.6833192 -0023  
3.7490458025705 -0037  
9.9379770918051 -0050  
1.4522066662518 -0025  
1.3770319448721 0002  
2.0399164363438 -0015  
1.3055465192601 -0012  
1.5264466632601 -0012  
2.3850729113438 -0015  
2.2785149537101 0008  
9.4808731498332 -0015  
1.4308168858153 0012  
2.0952538439549 -0002  
2.3418180678667 0005  
3.727119213229 0004  
3.1524557240039 -0025  
6.7312424999858 -0003  
7.5233582561554 0004  
8.4086882103239 0011  
1.7015934590827 0000  
1.39106288538 -0039  
1.229143966774 -0052  
1.1086676538864 -0026  
1.0512765236014 0001 ~  
6.4960940777094 -0016  
4.157500209734 -0013 ✓  
1.7212965402335 -0012  
2.6895258441148 -0015  
1.9421966842335 -0012  
3.0346823191148 -0015  
3.9547161155006 -0014  
5.9683053525124 0012  
5.0230750655846 -0003  
2.8857983327841 0008  
5.7298132590012 -0021  
2.2785149537101 0008  
3.0041058275842 0008  
1.5421105995242 0007  
8.83600576 -0014  
1.3806259 -0016  
1.4775301813068 0001  
1.7404961443326 -0007  
4.6833192 -0023  
1.4187304498693 -0036  
1.6923479076358 -0049  
1.8950656286663 -0025  
1.7969659339452 0002  
2.1501604770186 -0015  
6.1924621738136 -0013  
7.1865128218136 -0013  
2.4953169520186 -0015  
1.4680950650175 0007  
3.4460654244113 -0015  
5.2006693064537 0011  
5.7644976124126 -0002  
3.3119852814285 0005  
5.2711882898694 0004  
4.1138156347068 -0025  
8.7839744826849 -0003



5.0468221439543 0004  
2.8996456903325 0011  
1.7935533723286 0000  
1.39106288538 -0039  
5.531147850483 -0053  
7.4371687156356 -0027  
7.0521773097674 0000  
5.3936536709618 -0016  
1.553372257237 -0013  
7.7458344310506 -0013  
2.6895258441148 -0015  
8.7398850790506 -0013  
3.0346823191148 -0015  
2.2026846305829 -0014  
3.3242068676124 0012  
9.018465755572 -0003  
2.8857983327841 0008  
4.2180253318539 -0020  
1.4680950650175 0007  
1.836365081204 0007  
9.4266920636353 0005  
3.976202592 -0014  
1.3806259 -0016  
1.5573809509286 0001 ✓  
1.2471199833473 -0007  
4.6833192 -0023  
7.2840050025569 -0037  
8.6888038713923 -0050  
1.3578738585316 -0025  
1.2875823557062 0002  
2.0120978870186 -0015  
5.7948419146136 -0013  
6.7888925626136 -0013  
2.3572543620186 -0015  
3.7344520802969 0007  
4.5005602079994 -0015  
6.7920722484798 0011  
4.4138584960886 -0002  
3.5392412558748 0005  
5.6328774066725 0004  
2.9476777081954 -0025  
6.293992748125 -0003  
5.0468221439543 0004  
4.0467815537753 0011  
1.6783886548419 0000  
1.39106288538 -0039  
5.531147850483 -0053  
7.4371687156356 -0027  
7.0521773097674 0000  
5.3936536709618 -0016  
1.553372257237 -0013  
7.3482141718506 -0013  
2.5514632541148 -0015  
8.3422648198506 -0013  
2.8966197291148 -0015  
2.2026846305829 -0014  
3.3242068676124 0012  
9.018465755572 -0003  
1.0616258779981 0008  
1.5517248019294 -0020

|                 |       |
|-----------------|-------|
| 3.7344520802969 | 0007  |
| 4.735513773263  | 0007  |
| 2.5624405739059 | 0006  |
| 3.976202592     | -0014 |
| 1.3806259       | -0016 |
| 1.4573809509286 | 0001  |

ENTROPY8/CAL Jul 20, 2016.

Revises Feb 28 version

Uses action 3 to calculate entropy S  
For diatomics and linear triatomics,  
input mass of terminal atoms in L & N  
and central atom or monatomic in M

For other polyatomics, input LNOP  
Ia, Ib, and Ic as principal moments  
of inertia in ABC instead

Input electronic multiplicity as Q

Get vibrational entropy using eqn

$S_v = R \ln(e^x - 1) - R \ln(1 - e^{-x})$ ;  $x = h\nu/kT$

Get vibrational kinetic heat using

$C_{vv} = R x^2 / 2 (\cosh x - 1)$  ex Moore

Input rotational symmetry Z in r99

Add Set flag 5 at 4107

for mono-vibrational cmpds like N2

```
0680 002 HALT
0681 096 LABEL
0682 090 Z
0683 107 STO MEM
0684 057 9
0685 057 9
0686 119 print
0687 002 HALT
0688 048 0
```

Input electron multiplicity Qe in r89

```
0729 096 LABEL
0730 081 Q
0731 107 STO MEM
0732 056 8
0733 057 9
0734 119 print
0735 002 HALT
0736 048 0
```

Input gas pressure P (atm) in r01

```
0777 096 LABEL
0778 080 P
0779 107 STO MEM
0780 048 0
0781 049 1
0782 119 print
0783 002 HALT
0784 048 0
```

Input dipolyatomic mass L in r07

```
0825 096 LABEL
0826 076 L
0827 107 STO MEM
0828 048 0
0829 050 2
0830 119 print
0831 002 HALT
0832 048 0
0833 096 LABEL
0834 077 M
```

Input mon/polyatomic mass M in r03

```
0875 107 STO MEM
0876 048 0
0877 051 3
0878 119 print
```

```
0879 002 HALT
0880 048 0
Input di-polyatomic mass N in r04
0921 096 LABEL
0922 078 N
0923 107 STO MEM
0924 048 0
0925 052 4
0926 119 print
0927 002 HALT
0928 048 0
```

Input atomic mass3 O in r05

```
0969 096 LABEL
0970 079 0
0971 107 STO MEM
0972 048 0
0973 053 5
0974 119 print
0975 002 HALT
0976 048 0
```

Input atomic mass4 J in r06

```
1017 096 LABEL
1018 074 J
1019 107 STO MEM
1020 048 0
1021 054 6
1022 119 print
1023 002 HALT
1024 048 0
```

Input atomic mass5 Y in r07

```
1065 096 LABEL
1066 089 Y
1067 107 STO MEM
1068 048 0
1069 055 7
1070 119 print
1071 002 HALT
1072 048 0
1073 119 print
1074 002 HALT
1075 048 0
```

Input bond length r1=R in r09

```
1116 096 LABEL
1117 082 R
1118 107 STO MEM
1119 048 0
1120 057 9
1121 119 print
1122 002 HALT
1123 048 0
```

Input bond length r2=S in r10

```
1164 096 LABEL
1165 083 S
1166 107 STO MEM
1167 049 1
1168 048 0
1169 119 print
1170 002 HALT
1171 048 0
```

Input bond length r3=T in r11



|                                      |     |         |                                 |     |         |
|--------------------------------------|-----|---------|---------------------------------|-----|---------|
| 1212                                 | 096 | LABEL   | 1506                            | 051 | 3       |
| 1213                                 | 084 | T       | 1507                            | 051 | 3       |
| 1214                                 | 107 | STD MEM | 1508                            | 119 | print   |
| 1215                                 | 049 | 1       | 1509                            | 002 | HALT    |
| 1216                                 | 049 | 1       | 1510                            | 048 | 0       |
| 1217                                 | 119 | print   | Input frequency 4, I            |     |         |
| 1218                                 | 002 | HALT    | 1551                            | 096 | LABEL   |
| 1219                                 | 048 | 0       | 1552                            | 073 | I       |
| Input IrA rot. moment inertia in r12 |     |         | 1553                            | 107 | STD MEM |
| 1260                                 | 096 | LABEL   | 1554                            | 051 | 3       |
| 1261                                 | 065 | A       | 1555                            | 052 | 4       |
| 1262                                 | 107 | STD MEM | 1556                            | 119 | print   |
| 1263                                 | 049 | 1       | 1557                            | 002 | HALT    |
| 1264                                 | 050 | 2       | 1558                            | 048 | 0       |
| 1265                                 | 119 | print   | Input degeneracy F, D           |     |         |
| 1266                                 | 002 | HALT    | 1599                            | 096 | LABEL   |
| 1267                                 | 048 | 0       | 1600                            | 068 | D       |
| Input IrB rot. moment inertia in r13 |     |         | 1601                            | 107 | STD MEM |
| 1308                                 | 096 | LABEL   | 1602                            | 051 | 3       |
| 1309                                 | 066 | B       | 1603                            | 053 | 5       |
| 1310                                 | 107 | STD MEM | 1604                            | 119 | print   |
| 1311                                 | 049 | 1       | 1605                            | 002 | HALT    |
| 1312                                 | 051 | 3       | 1606                            | 048 | 0       |
| 1313                                 | 119 | print   | Input degeneracy G, E           |     |         |
| 1314                                 | 002 | HALT    | 1647                            | 096 | LABEL   |
| 1315                                 | 048 | 0       | 1648                            | 069 | E       |
| Input IrC rot. moment inertia in r14 |     |         | 1649                            | 107 | STD MEM |
| 1356                                 | 096 | LABEL   | 1650                            | 051 | 3       |
| 1357                                 | 067 | C       | 1651                            | 054 | 6       |
| 1358                                 | 107 | STD MEM | 1652                            | 119 | print   |
| 1359                                 | 049 | 1       | 1653                            | 002 | HALT    |
| 1360                                 | 052 | 4       | 1654                            | 048 | 0       |
| 1361                                 | 119 | print   | Input degeneracy W, for H and I |     |         |
| 1362                                 | 002 | HALT    | 1695                            | 096 | LABEL   |
| 1363                                 | 109 | RCL MEM | 1696                            | 087 | W       |
| Input frequency 1 $w=c/v$ , F        |     |         | 1697                            | 107 | STD MEM |
| 1404                                 | 096 | LABEL   | 1698                            | 051 | 3       |
| 1405                                 | 070 | F       | 1699                            | 055 | 7       |
| 1406                                 | 107 | STD MEM | 1700                            | 119 | print   |
| 1407                                 | 053 | 5       | 1701                            | 002 | HALT    |
| 1408                                 | 051 | 3       | 1702                            | 048 | 0       |
| 1409                                 | 107 | STD MEM | Input degrees Kelvin K in r08   |     |         |
| 1410                                 | 051 | 3       | 1743                            | 096 | LABEL   |
| 1411                                 | 049 | 1       | 1744                            | 075 | K       |
| 1412                                 | 119 | print   | 1745                            | 107 | STD MEM |
| 1413                                 | 002 | HALT    | 1746                            | 048 | 0       |
| 1414                                 | 048 | 0       | 1747                            | 056 | 8       |
| Input frequency 2, G                 |     |         | 1748                            | 119 | print   |
| 1455                                 | 096 | LABEL   | 1749                            | 002 | HALT    |
| 1456                                 | 071 | G       | Execute by ShiftX               |     |         |
| 1457                                 | 107 | STD MEM | 1790                            | 096 | LABEL   |
| 1458                                 | 051 | 3       | 1791                            | 088 | X       |
| 1459                                 | 050 | 2       | Store H atomic mass in g in r95 |     |         |
| 1460                                 | 119 | print   | 1832                            | 049 | 1       |
| 1461                                 | 002 | HALT    | 1833                            | 046 | .       |
| 1462                                 | 048 | 0       | 1834                            | 054 | 6       |
| Input frequency 3, H                 |     |         | 1835                            | 055 | 7       |
| 1503                                 | 096 | LABEL   | 1836                            | 051 | 3       |
| 1504                                 | 072 | H       | 1837                            | 053 | 5       |
| 1505                                 | 107 | STD MEM | 1838                            | 050 | 2       |

|                                       |     |         |
|---------------------------------------|-----|---------|
| 1839                                  | 053 | 5       |
| 1840                                  | 101 | EE      |
| 1841                                  | 050 | 2       |
| 1842                                  | 052 | 4       |
| 1843                                  | 111 | +/-     |
| 1844                                  | 107 | STO MEM |
| 1845                                  | 057 | 9       |
| 1846                                  | 053 | 5       |
| Store gas constant R in r96           |     |         |
| 1887                                  | 056 | 8       |
| 1888                                  | 046 | .       |
| 1889                                  | 051 | 3       |
| 1890                                  | 049 | 1       |
| 1891                                  | 052 | 4       |
| 1892                                  | 052 | 4       |
| 1893                                  | 054 | 6       |
| 1894                                  | 050 | 2       |
| 1895                                  | 049 | 1       |
| 1896                                  | 055 | 7       |
| 1897                                  | 053 | 5       |
| 1898                                  | 107 | STO MEM |
| 1899                                  | 057 | 9       |
| 1900                                  | 054 | 6       |
| Store Boltzmann's constant k in r97   |     |         |
| 1941                                  | 049 | 1       |
| 1942                                  | 046 | .       |
| 1943                                  | 051 | 3       |
| 1944                                  | 056 | 8       |
| 1945                                  | 048 | 0       |
| 1946                                  | 054 | 6       |
| 1947                                  | 052 | 4       |
| 1948                                  | 056 | 8       |
| 1949                                  | 056 | 8       |
| 1950                                  | 101 | EE      |
| 1951                                  | 049 | 1       |
| 1952                                  | 054 | 6       |
| 1953                                  | 111 | +/-     |
| 1954                                  | 107 | STO MEM |
| 1955                                  | 057 | 9       |
| 1956                                  | 055 | 7       |
| Store Planck's red. quantum h- in r98 |     |         |
| 1997                                  | 049 | 1       |
| 1998                                  | 046 | .       |
| 1999                                  | 048 | 0       |
| 2000                                  | 053 | 5       |
| 2001                                  | 052 | 4       |
| 2002                                  | 057 | 9       |
| 2003                                  | 049 | 1       |
| 2004                                  | 056 | 8       |
| 2005                                  | 053 | 5       |
| 2006                                  | 101 | EE      |
| 2007                                  | 050 | 2       |
| 2008                                  | 055 | 7       |
| 2009                                  | 111 | +/-     |
| 2010                                  | 107 | STO MEM |
| 2011                                  | 057 | 9       |
| 2012                                  | 056 | 8       |
| 2013                                  | 050 | 2       |
| 2014                                  | 046 | .       |
| 2015                                  | 057 | 9       |

|                                       |     |         |
|---------------------------------------|-----|---------|
| 2016                                  | 057 | 9       |
| 2017                                  | 055 | 7       |
| 2018                                  | 057 | 9       |
| 2019                                  | 050 | 2       |
| 2020                                  | 052 | 4       |
| 2021                                  | 053 | 5       |
| 2022                                  | 056 | 8       |
| 2023                                  | 101 | EE      |
| 2024                                  | 049 | 1       |
| 2025                                  | 048 | 0       |
| 2026                                  | 119 | print   |
| Store c in r94                        |     |         |
| 2067                                  | 107 | STO MEM |
| 2068                                  | 057 | 9       |
| 2069                                  | 052 | 4       |
| 2070                                  | 040 | (       |
| 2071                                  | 040 | (       |
| Recall pressure (atm), find radius rt |     |         |
| Calcul (TnxPo)/(ToxPn)                |     |         |
| 2152                                  | 109 | RCL MEM |
| 2153                                  | 048 | 0       |
| 2154                                  | 056 | 8       |
| 2155                                  | 047 | /       |
| 2156                                  | 109 | RCL MEM |
| 2157                                  | 048 | 0       |
| 2158                                  | 049 | 1       |
| 2159                                  | 047 | /       |
| 2160                                  | 050 | 2       |
| 2161                                  | 057 | 9       |
| 2162                                  | 056 | 8       |
| 2163                                  | 046 | .       |
| 2164                                  | 049 | 1       |
| 2165                                  | 053 | 5       |
| 2166                                  | 061 | =       |
| 2167                                  | 119 | print   |
| 2168                                  | 092 | Root    |
| 2169                                  | 051 | 3       |
| 2170                                  | 042 | x       |
| 2171                                  | 049 | 1       |
| 2172                                  | 046 | .       |
| 2173                                  | 055 | 7       |
| 2174                                  | 049 | 1       |
| 2175                                  | 056 | 8       |
| 2176                                  | 056 | 8       |
| 2177                                  | 041 | )       |
| 2178                                  | 042 | x       |
| 2179                                  | 049 | 1       |
| 2180                                  | 101 | EE      |
| 2181                                  | 055 | 7       |
| 2182                                  | 111 | +/-     |
| 2183                                  | 061 | =       |
| Print radius r                        |     |         |
| 2224                                  | 119 | print   |
| 2225                                  | 121 | Cube    |
| 2226                                  | 042 | x       |
| 2227                                  | 056 | 8       |
| 2228                                  | 061 | =       |
| 2229                                  | 114 | 1/x     |
| Print N/cm^3                          |     |         |
| 2270                                  | 119 | print   |



|                           |     |         |                                  |     |         |
|---------------------------|-----|---------|----------------------------------|-----|---------|
| 2271                      | 114 | 1/x     | 2643                             | 061 | =       |
| 2272                      | 047 | /       | 2644                             | 092 | Root    |
| 2273                      | 056 | 8       | 2645                             | 050 | 2       |
| 2274                      | 061 | =       | 2646                             | 061 | =       |
| 2275                      | 064 | Inverse | Print and store action @t in r16 |     |         |
| 2276                      | 121 | Cube    | 2687                             | 119 | print   |
| 2277                      | 061 | =       | 2688                             | 107 | STO MEM |
| 2278                      | 113 | Square  | 2689                             | 049 | 1       |
| 2279                      | 042 | x       | 2690                             | 054 | 6       |
| 2280                      | 040 | (       | 2691                             | 047 | /       |
| Recall AW 1 from r02      |     |         | Recall h-                        |     |         |
| 2321                      | 109 | RCL MEM | 2732                             | 109 | RCL MEM |
| 2322                      | 048 | 0       | 2733                             | 057 | 9       |
| 2323                      | 050 | 2       | 2734                             | 056 | 8       |
| 2324                      | 043 | +       | 2735                             | 061 | =       |
| Recall AW 2 from r03      |     |         | Print and store @/h- in r17      |     |         |
| 2365                      | 109 | RCL MEM | 2776                             | 107 | STO MEM |
| 2366                      | 048 | 0       | 2777                             | 049 | 1       |
| 2367                      | 051 | 3       | 2778                             | 055 | 7       |
| 2368                      | 043 | +       | 2779                             | 119 | print   |
| Recall AW 3 from r04      |     |         | 2780                             | 049 | 1       |
| 2409                      | 109 | RCL MEM | 2781                             | 048 | 0       |
| 2410                      | 048 | 0       | 2782                             | 046 | .       |
| 2411                      | 052 | 4       | 2783                             | 050 | 2       |
| 2412                      | 043 | +       | 2784                             | 050 | 2       |
| Recall AW 4 from r05      |     |         | 2785                             | 057 | 9       |
| 2453                      | 109 | RCL MEM | 2786                             | 055 | 7       |
| 2454                      | 048 | 0       | 2787                             | 092 | Root    |
| 2455                      | 053 | 5       | 2788                             | 051 | 3       |
| 2456                      | 043 | +       | 2789                             | 061 | =       |
| Recall AW 5 from r06      |     |         | 2790                             | 114 | 1/x     |
| 2497                      | 109 | RCL MEM | 2791                             | 042 | x       |
| 2498                      | 048 | 0       | 2792                             | 109 | RCL MEM |
| 2499                      | 054 | 6       | 2793                             | 049 | 1       |
| Recall AW 6 from r07      |     |         | 2794                             | 055 | 7       |
| 2540                      | 109 | RCL MEM | 2795                             | 061 | =       |
| 2541                      | 048 | 0       | Print nt                         |     |         |
| 2542                      | 055 | 7       | 2836                             | 119 | print   |
| 2543                      | 041 | )       | 2837                             | 121 | Cube    |
| 2544                      | 042 | x       | 2838                             | 119 | print   |
| 2545                      | 109 | RCL MEM | 2839                             | 110 | LOG e   |
| 2546                      | 057 | 9       | 2840                             | 042 | x       |
| 2547                      | 053 | 5       | 2841                             | 109 | RCL MEM |
| 2548                      | 061 | =       | 2842                             | 057 | 9       |
| Print and store It in r15 |     |         | 2843                             | 054 | 6       |
| 2589                      | 119 | print   | 2844                             | 061 | =       |
| 2590                      | 107 | STO MEM | 2845                             | 107 | STO MEM |
| 2591                      | 049 | 1       | 2846                             | 049 | 1       |
| 2592                      | 053 | 5       | 2847                             | 056 | 8       |
| 2593                      | 042 | x       | 2848                             | 109 | RCL MEM |
| Recall k                  |     |         | 2849                             | 049 | 1       |
| 2634                      | 109 | RCL MEM | 2850                             | 056 | 8       |
| 2635                      | 057 | 9       | 2851                             | 119 | print   |
| 2636                      | 055 | 7       | 2852                             | 107 | STO MEM |
| 2637                      | 042 | x       | 2853                             | 054 | 6       |
| 2638                      | 051 | 3       | 2854                             | 049 | 1       |
| 2639                      | 042 | x       | 2855                             | 109 | RCL MEM |
| 2640                      | 109 | RCL MEM | 2856                             | 054 | 6       |
| 2641                      | 048 | 0       | 2857                             | 049 | 1       |
| 2642                      | 056 | 8       | Print cumulative -G/T            |     |         |



```

2898 119 print
2899 109 RCL MEM
2900 057 9
2901 054 6
2902 042 x
2903 050 2
2904 046 .
2905 053 5
2906 061 =
2907 117 SUM MEM
2908 049 1
2909 056 8
2910 107 STD MEM
2911 054 6
2912 050 2
2913 109 RCL MEM
2914 054 6
2915 050 2
Print cmulative H/T
2956 119 print
2957 109 RCL MEM
2958 049 1
2959 056 8
2960 119 print
Print St with Qe=1
Check for Qe eg 02 3, N20 4
3041 040 (
3042 049 1
3043 045 -
3044 109 RCL MEM
3045 056 8
3046 057 9
3047 041 )
3048 038 If zero
3049 104 Hyperbol
3050 109 RCL MEM
3051 056 8
3052 057 9
3053 110 LOG e
3054 042 x
3055 109 RCL MEM
3056 057 9
3057 054 6
3058 061 =
3059 117 SUM MEM
3060 054 6
3061 049 1
3062 117 SUM MEM
3063 049 1
3064 056 8
3065 109 RCL MEM
3066 049 1
3067 056 8
Print St with Qe>1
3108 119 print
3109 109 RCL MEM
3110 054 6
3111 049 1
Print cumulative -G/T
3152 119 print

```

```

3153 096 LABEL
3154 104 Hyperbol
Test if monatomic
3195 109 RCL MEM
3196 048 0
3197 052 4
3198 038 If zero
3199 115 Sine
Calculate rotational entropy
Test if non-linear
3280 040 (
3281 048 0
3282 045 -
Recall Ia
3323 109 RCL MEM
3324 049 1
3325 050 2
3326 041 )
3327 064 Inverse
3328 037 If pos
3329 116 Tangent
3330 040 (
Calculate reduced mass
3371 040 (
3372 109 RCL MEM
3373 048 0
3374 050 2
3375 042 x
3376 109 RCL MEM
3377 048 0
3378 052 4
3379 041 )
3380 047 /
3381 040 (
3382 109 RCL MEM
3383 048 0
3384 050 2
3385 043 +
3386 109 RCL MEM
3387 048 0
3388 052 4
3389 041 )
3390 042 x
Recall H atom mass
3431 109 RCL MEM
3432 057 9
3433 053 5
3434 042 x
3435 040 (
3436 109 RCL MEM
3437 048 0
3438 057 9
3439 043 +
3440 109 RCL MEM
3441 049 1
3442 048 0
3443 041 )
3444 113 Square
3445 041 )
Print and store Ir in r19

```

```

3486 119 print
3487 107 STO MEM
3488 049 1
3489 057 9
3490 040 (
3491 109 RCL MEM
3492 049 1
3493 057 9
3494 042 x
Recall degrees K
3535 109 RCL MEM
3536 048 0
3537 056 8
3538 042 x
Recall k
3579 109 RCL MEM
3580 057 9
3581 055 7
3582 042 x
3583 050 2
3584 041 )
3585 061 =
3586 092 Root
3587 050 2
3588 061 =
Print and store @r in r20
3629 119 print
3630 107 STO MEM
3631 050 2
3632 048 0
Calculate Sr
3673 040 (
3674 109 RCL MEM
3675 050 2
3676 048 0
3677 047 /
Recall h-
3718 109 RCL MEM
3719 057 9
3720 056 8
3721 041 )
Print and store @h- in r21
3762 119 print
3763 107 STO MEM
3764 050 2
3765 049 1
Recall symmetry factor
3806 109 RCL MEM
3807 057 9
3808 057 9
3809 092 Root
3810 050 2
3811 061 =
3812 114 1/x
3813 042 x
3814 109 RCL MEM
3815 050 2
3816 049 1
3817 061 =
Print nr

```

```

3858 119 print
3859 113 Square
Print nr squared
3900 119 print
3901 110 LOG e
3902 042 x
Recall R
3943 109 RCL MEM
3944 057 9
3945 054 6
3946 061 =
Print and store -G/T in r22
3987 119 print
3988 107 STO MEM
3989 050 2
3990 050 2
3991 117 SUM MEM
3992 054 6
3993 049 1
3994 109 RCL MEM
3995 054 6
3996 049 1
3997 119 print
3998 109 RCL MEM
3999 057 9
4000 054 6
4001 117 SUM MEM
4002 054 6
4003 050 2
4004 117 SUM MEM
4005 050 2
4006 050 2
4007 109 RCL MEM
4008 054 6
4009 050 2
Print cumulative C
4050 119 print
4051 109 RCL MEM
4052 050 2
4053 050 2
4054 119 print
4055 043 +
4056 109 RCL MEM
4057 049 1
4058 056 8
4059 119 print
4060 061 =
Print St+Sr
4101 119 print
4102 107 STO MEM
4103 053 5
4104 055 7
4105 034 Set flag
4106 049 1
4107 000
4108 000
4109 040 (
4110 048 0
4111 045 -
4112 109 RCL MEM

```



```

4113 051 3
4114 049 1
4115 041 )
4116 064 Inverse
4117 037 If pos
4118 086 V
4119 109 RCL MEM
4120 053 5
4121 055 7
4122 042 x
4123 109 RCL MEM
4124 048 0
4125 056 8
4126 061 =
Print cumulative ST
4167 119 print
4168 109 RCL MEM
4169 054 6
4170 049 1
4171 042 x
4172 109 RCL MEM
4173 048 0
4174 056 8
4175 061 =
Print cumulative -G
4216 119 print
4217 109 RCL MEM
4218 054 6
4219 050 2
4220 042 x
4221 109 RCL MEM
4222 048 0
4223 056 8
4224 061 =
Print cumulative H
4265 119 print
4266 002 HALT
Calculate Sr for polyatomic gases
 $Sr = R \ln[\pi^{1/2} e^{3/2} a^2 b^2 c / h^{-3/2}]$ 
Calculate @rA
4387 096 LABEL
4388 116 Tangent
4389 040 (
4390 109 RCL MEM
4391 049 1
4392 050 2
4393 042 x
4394 109 RCL MEM
4395 048 0
4396 056 8
4397 042 x
4398 050 2
4399 042 x
Recall k
4440 109 RCL MEM
4441 057 9
4442 055 7
4443 041 )
4444 092 Root
4445 050 2

```

```

4446 061 =
Print and store @rA in r23
4487 119 print
4488 107 STO MEM
4489 050 2
4490 051 3
4491 109 RCL MEM
4492 050 2
4493 051 3
4494 047 /
Recall h-
4535 109 RCL MEM
4536 057 9
4537 056 8
4538 061 =
Print and store @rA/h- in r24
4579 119 print
4580 107 STO MEM
4581 050 2
4582 052 4
4583 109 RCL MEM
4584 057 9
4585 057 9
4586 092 Root
4587 051 3
4588 061 =
4589 114 1/x
4590 042 x
4591 109 RCL MEM
4592 050 2
4593 052 4
4594 061 =
Print nra
4635 119 print
4636 042 x
4637 040 (
4638 112 pi
4639 092 Root
4640 054 6
4641 041 )
4642 061 =
Print n with pi-exp6 correction
4683 119 print
Calculate @rB
4724 040 (
4725 109 RCL MEM
4726 049 1
4727 051 3
4728 042 x
4729 109 RCL MEM
4730 048 0
4731 056 8
4732 042 x
4733 050 2
4734 042 x
Recall k
4775 109 RCL MEM
4776 057 9
4777 055 7
4778 041 )

```



```

4779 092 Root
4780 050 2
4781 061 =
Print and store @rB in r25
4822 119 print
4823 107 STO MEM
4824 050 2
4825 053 5
4826 109 RCL MEM
4827 050 2
4828 053 5
4829 047 /
Recall h-
4870 109 RCL MEM
4871 057 9
4872 056 8
4873 061 =
Print and store @rB/h- in r26
4914 119 print
4915 107 STO MEM
4916 050 2
4917 054 6
4918 109 RCL MEM
4919 057 9
4920 057 9
4921 092 Root
4922 051 3
4923 061 =
4924 114 1/x
4925 042 x
4926 109 RCL MEM
4927 050 2
4928 054 6
4929 061 =
Print nrb
4970 119 print
4971 042 x
4972 040 (
4973 112 pi
4974 092 Root
4975 054 6
4976 041 )
4977 061 =
4978 119 print
Calculate @rC
5019 040 (
5020 109 RCL MEM
5021 049 1
5022 052 4
5023 042 x
5024 109 RCL MEM
5025 048 0
5026 056 8
5027 042 x
5028 050 2
5029 042 x
Recall k
5070 109 RCL MEM
5071 057 9
5072 055 7

```

```

5073 041 )
5074 092 Root
5075 050 2
5076 061 =
Print and store @rC in r27
5117 119 print
5118 107 STO MEM
5119 050 2
5120 055 7
5121 109 RCL MEM
5122 050 2
5123 055 7
5124 047 /
Recall h-
5165 109 RCL MEM
5166 057 9
5167 056 8
5168 061 =
Print and store @rC/h- in r28
5209 119 print
5210 107 STO MEM
5211 050 2
5212 056 8
5213 109 RCL MEM
5214 057 9
5215 057 9
5216 092 Root
5217 051 3
5218 061 =
5219 114 1/x
5220 042 x
5221 109 RCL MEM
5222 050 2
5223 056 8
5224 061 =
Print nrc
5265 119 print
5266 042 x
5267 040 (
5268 112 pi
5269 092 Root
5270 054 6
5271 041 )
5272 061 =
5273 119 print
5274 040 (
5275 109 RCL MEM
5276 050 2
5277 052 4
5278 042 x
5279 109 RCL MEM
5280 050 2
5281 054 6
5282 042 x
5283 109 RCL MEM
5284 050 2
5285 056 8
5286 041 )
Print nrA x nrB x nrC
5327 119 print

```

```

Recall symmetry factor
5368 042 x
5369 040 (
5370 112 pi
5371 092 Root
5372 050 2
5373 041 )
5374 047 /
5375 109 RCL MEM
5376 057 9
5377 057 9
5378 061 =
Print nrcubed
5419 119 print
5420 110 LOG e
5421 042 x
Recall R
5462 109 RCL MEM
5463 057 9
5464 054 6
5465 061 =
Print and store -Gr/T in r29
5506 119 print
5507 107 STO MEM
5508 050 2
5509 057 9
5510 117 SUM MEM
5511 054 6
5512 049 1
5513 109 RCL MEM
5514 054 6
5515 049 1
Print cumulative -G/T
5556 119 print
5557 040 (
5558 049 1
5559 046 .
5560 053 5
5561 042 x
5562 109 RCL MEM
5563 057 9
5564 054 6
5565 041 )
5566 117 SUM MEM
5567 050 2
5568 057 9
Print Sr
5609 119 print
5610 117 SUM MEM
5611 054 6
5612 050 2
5613 109 RCL MEM
5614 054 6
5615 050 2
Print (Ht+Hr)/T
5656 119 print
5657 109 RCL MEM
5658 050 2
5659 057 9
Print Sr non-linear molecules

```

```

5700 119 print
5701 043 +
5702 109 RCL MEM
5703 049 1
5704 056 8
5705 061 =
Print St+Sr
5746 119 print
5747 034 Set flag
5748 049 1
5749 096 LABEL
5750 086 V
5751 109 RCL MEM
5752 051 3
5753 049 1
Print wavelength cm^-1
5794 119 print
5795 042 x
5796 109 RCL MEM
5797 057 9
5798 052 4
5799 061 =
Print true frequency v
5840 119 print
5841 042 x
5842 050 2
5843 042 x
5844 112 pi
5845 042 x
5846 109 RCL MEM
5847 057 9
5848 056 8
5849 061 =
5850 119 print
Store hv in r43
5891 107 STO MEM
5892 052 4
5893 051 3
Recall temperature K
5934 109 RCL MEM
5935 048 0
5936 056 8
5937 042 x
5938 109 RCL MEM
5939 057 9
5940 055 7
5941 061 =
Print kT
5982 119 print
Store kT in r44
6023 107 STO MEM
6024 052 4
6025 052 4
6026 109 RCL MEM
6027 052 4
6028 051 3
6029 047 /
6030 109 RCL MEM
6031 052 4
6032 052 4

```



|                               |     |          |                                  |     |         |
|-------------------------------|-----|----------|----------------------------------|-----|---------|
| 6033                          | 061 | =        | 6171                             | 052 | 4       |
| Store hv/kT = x in r45, print |     |          | 6172                             | 054 | 6       |
| 6074                          | 119 | print    | 6173                             | 045 | -       |
| 6075                          | 107 | STO MEM  | 6174                             | 109 | RCL MEM |
| 6076                          | 052 | 4        | 6175                             | 052 | 4       |
| 6077                          | 053 | 5        | 6176                             | 055 | 7       |
| Calculate Sv                  |     |          | 6177                             | 041 | )       |
| 6118                          | 040 | (        | 6178                             | 107 | STO MEM |
| 6119                          | 109 | RCL MEM  | 6179                             | 052 | 4       |
| 6120                          | 057 | 9        | 6180                             | 056 | 8       |
| 6121                          | 054 | 6        | Print Sv at w without degeneracy |     |         |
| 6122                          | 042 | x        | 6221                             | 119 | print   |
| 6123                          | 109 | RCL MEM  | 6222                             | 042 | x       |
| 6124                          | 052 | 4        | Recall degeneracy D              |     |         |
| 6125                          | 053 | 5        | 6263                             | 109 | RCL MEM |
| 6126                          | 047 | /        | 6264                             | 051 | 3       |
| 6127                          | 040 | (        | 6265                             | 053 | 5       |
| 6128                          | 040 | (        | 6266                             | 061 | =       |
| 6129                          | 049 | 1        | Print and store total Sv in r49  |     |         |
| 6130                          | 064 | Inverse  | 6307                             | 119 | print   |
| 6131                          | 110 | LOG e    | 6308                             | 117 | SUM MEM |
| 6132                          | 091 | Exponent | 6309                             | 052 | 4       |
| 6133                          | 109 | RCL MEM  | 6310                             | 057 | 9       |
| 6134                          | 052 | 4        | 6311                             | 119 | print   |
| 6135                          | 053 | 5        | 6312                             | 109 | RCL MEM |
| 6136                          | 041 | )        | 6313                             | 052 | 4       |
| 6137                          | 045 | -        | 6314                             | 057 | 9       |
| 6138                          | 049 | 1        | Print cumulative Sv              |     |         |
| 6139                          | 041 | )        | 6355                             | 119 | print   |
| 6140                          | 061 | =        | 6356                             | 047 | /       |
| 6141                          | 107 | STO MEM  | 6357                             | 054 | 6       |
| 6142                          | 052 | 4        | 6358                             | 046 | .       |
| 6143                          | 054 | 6        | 6359                             | 048 | 0       |
| 6144                          | 040 | (        | 6360                             | 050 | 2       |
| 6145                          | 049 | 1        | 6361                             | 050 | 2       |
| 6146                          | 045 | -        | 6362                             | 049 | 1       |
| 6147                          | 040 | (        | 6363                             | 052 | 4       |
| 6148                          | 040 | (        | 6364                             | 049 | 1       |
| 6149                          | 049 | 1        | 6365                             | 053 | 5       |
| 6150                          | 064 | Inverse  | 6366                             | 101 | EE      |
| 6151                          | 110 | LOG e    | 6367                             | 049 | 1       |
| 6152                          | 041 | )        | 6368                             | 054 | 6       |
| 6153                          | 091 | Exponent | 6369                             | 061 | =       |
| 6154                          | 109 | RCL MEM  | 6370                             | 119 | print   |
| 6155                          | 052 | 4        | ergs per molecule per degree     |     |         |
| 6156                          | 053 | 5        | 6411                             | 042 | x       |
| 6157                          | 111 | +/-      | 6412                             | 109 | RCL MEM |
| 6158                          | 041 | )        | 6413                             | 048 | 0       |
| 6159                          | 041 | )        | 6414                             | 056 | 8       |
| 6160                          | 110 | LOG e    | 6415                             | 061 | =       |
| 6161                          | 042 | x        | Print sT                         |     |         |
| 6162                          | 109 | RCL MEM  | 6456                             | 119 | print   |
| 6163                          | 057 | 9        | 6457                             | 117 | SUM MEM |
| 6164                          | 054 | 6        | 6458                             | 053 | 5       |
| 6165                          | 061 | =        | 6459                             | 048 | 0       |
| 6166                          | 107 | STO MEM  | 6460                             | 109 | RCL MEM |
| 6167                          | 052 | 4        | 6461                             | 053 | 5       |
| 6168                          | 055 | 7        | 6462                             | 048 | 0       |
| 6169                          | 040 | (        | Print svT                        |     |         |
| 6170                          | 109 | RCL MEM  | 6503                             | 119 | print   |



Compute Cv at T with Moore formula

$Cv = R \times \sqrt{2} (\cosh x - 1)$

```

6584 040 (
6585 040 (
6586 109 RCL MEM
6587 057 9
6588 054 6
6589 042 x
6590 040 (
6591 109 RCL MEM
6592 052 4
6593 053 5
6594 113 Square
6595 041 )
6596 041 )
6597 047 /
6598 040 (
6599 050 2
6600 042 x
6601 040 (
6602 109 RCL MEM
6603 052 4
6604 053 5
6605 104 Hyperbol
6606 099 Cosine
6607 045 -
6608 049 1
6609 041 )
6610 041 )
6611 047 /
6612 050 2
6613 061 =
Print cumulative Cv/2
6654 119 print
6655 117 SUM MEM
6656 053 5
6657 049 1
6658 117 SUM MEM
6659 054 6
6660 050 2
6661 109 RCL MEM
6662 054 6
6663 050 2
Print cumulative Cv kinetic
6704 119 print
6705 109 RCL MEM
6706 053 5
6707 049 1
Print SumCvvib/2
6748 119 print
6749 047 /
6750 054 6
6751 046 .
6752 048 0
6753 050 2
6754 050 2
6755 049 1
6756 052 4
6757 049 1
6758 053 5

```

```

6759 101 EE
6760 049 1
6761 054 6
6762 061 =
Print ergs per molecule per degree
6803 119 print
6804 042 x
6805 109 RCL MEM
6806 048 0
6807 056 8
6808 061 =
Print cvvT/2 kinetic
6849 119 print
6850 117 SUM MEM
6851 053 5
6852 050 2
6853 109 RCL MEM
6854 053 5
6855 050 2
Print SumcvvT
6896 119 print
6897 035 If flag
6898 053 5
6899 125 !
6900 035 If flag
6901 052 4
6902 123 !
6903 035 If flag
6904 051 3
6905 033 !
6906 035 If flag
6907 050 2
6908 099 Cosine
6909 109 RCL MEM
6910 051 3
6911 050 2
6912 107 STO MEM
6913 051 3
6914 049 1
6915 119 print
6916 109 RCL MEM
6917 051 3
6918 054 6
6919 107 STO MEM
6920 051 3
6921 053 5
6922 064 Inverse
6923 034 Set flag
6924 049 1
6925 034 Set flag
6926 050 2
6927 086 V
6928 096 LABEL
6929 099 Cosine
6930 109 RCL MEM
6931 051 3
6932 051 3
6933 107 STO MEM
6934 051 3
6935 049 1

```

|                         |     |          |                       |     |         |
|-------------------------|-----|----------|-----------------------|-----|---------|
| 6936                    | 119 | print    | 7113                  | 040 | (       |
| 6937                    | 109 | RCL MEM  | 7114                  | 109 | RCL MEM |
| 6938                    | 051 | 3        | 7115                  | 053 | 5       |
| 6939                    | 055 | 7        | 7116                  | 048 | 0       |
| 6940                    | 107 | STO MEM  | 7117                  | 045 | -       |
| 6941                    | 051 | 3        | 7118                  | 109 | RCL MEM |
| 6942                    | 053 | 5        | 7119                  | 053 | 5       |
| 6943                    | 064 | Inverse  | 7120                  | 050 | 2       |
| 6944                    | 034 | Set flag | 7121                  | 041 | )       |
| 6945                    | 050 | 2        | Print svT-cvvT/2=-GvT |     |         |
| 6946                    | 034 | Set flag | 7162                  | 119 | print   |
| 6947                    | 051 | 3        | 7163                  | 040 | (       |
| 6948                    | 086 | V        | 7164                  | 040 | (       |
| 6949                    | 096 | LABEL    | 7165                  | 040 | (       |
| 6950                    | 033 | !        | 7166                  | 109 | RCL MEM |
| 6951                    | 109 | RCL MEM  | 7167                  | 049 | 1       |
| 6952                    | 051 | 3        | 7168                  | 056 | 8       |
| 6953                    | 052 | 4        | 7169                  | 043 | +       |
| 6954                    | 038 | If zero  | 7170                  | 109 | RCL MEM |
| 6955                    | 125 | ! !      | 7171                  | 050 | 2       |
| 6956                    | 107 | STO MEM  | 7172                  | 050 | 2       |
| 6957                    | 051 | 3        | 7173                  | 043 | +       |
| 6958                    | 049 | 1        | 7174                  | 109 | RCL MEM |
| 6959                    | 119 | print    | 7175                  | 050 | 2       |
| 6960                    | 109 | RCL MEM  | 7176                  | 057 | 9       |
| 6961                    | 051 | 3        | 7177                  | 041 | )       |
| 6962                    | 055 | 7        | Print St+Sr           |     |         |
| 6963                    | 107 | STO MEM  | 7218                  | 119 | print   |
| 6964                    | 051 | 3        | 7219                  | 043 | +       |
| 6965                    | 053 | 5        | 7220                  | 109 | RCL MEM |
| 6966                    | 064 | Inverse  | 7221                  | 052 | 4       |
| 6967                    | 034 | Set flag | 7222                  | 057 | 9       |
| 6968                    | 051 | 3        | 7223                  | 041 | )       |
| 6969                    | 034 | Set flag | 7224                  | 107 | STO MEM |
| 6970                    | 052 | 4        | 7225                  | 053 | 5       |
| 6971                    | 086 | V        | 7226                  | 053 | 5       |
| 6972                    | 096 | LABEL    | Print St+Sr+Sv        |     |         |
| 6973                    | 123 | ! !      | 7267                  | 119 | print   |
| 6974                    | 096 | LABEL    | 7268                  | 042 | x       |
| 6975                    | 125 | ! !      | 7269                  | 109 | RCL MEM |
| 6976                    | 040 | (        | 7270                  | 048 | 0       |
| 6977                    | 109 | RCL MEM  | 7271                  | 056 | 8       |
| 6978                    | 052 | 4        | 7272                  | 061 | =       |
| 6979                    | 057 | 9        | Print [St+Sr+Sv]T     |     |         |
| 6980                    | 045 | -        | 7313                  | 119 | print   |
| 6981                    | 109 | RCL MEM  | 7314                  | 047 | /       |
| 6982                    | 053 | 5        | 7315                  | 054 | 6       |
| 6983                    | 049 | 1        | 7316                  | 046 | .       |
| 6984                    | 041 | )        | 7317                  | 048 | 0       |
| Print Sv-Cvib/2=-Gvib/T |     |          | 7318                  | 050 | 2       |
| 7025                    | 119 | print    | 7319                  | 050 | 2       |
| Sum cumulative -G/T     |     |          | 7320                  | 049 | 1       |
| 7066                    | 117 | SUM MEM  | 7321                  | 052 | 4       |
| 7067                    | 054 | 6        | 7322                  | 049 | 1       |
| 7068                    | 049 | 1        | 7323                  | 053 | 5       |
| 7069                    | 109 | RCL MEM  | 7324                  | 101 | EE      |
| 7070                    | 054 | 6        | 7325                  | 049 | 1       |
| 7071                    | 049 | 1        | 7326                  | 054 | 6       |
| Print cumulative -G/T   |     |          | 7327                  | 061 | =       |
| 7112                    | 119 | print    | 7328                  | 119 | print   |



[st+sr+sv]T printed

|      |     |         |
|------|-----|---------|
| 7369 | 040 | (       |
| 7370 | 109 | RCL MEM |
| 7371 | 053 | 5       |
| 7372 | 053 | 5       |
| 7373 | 047 | /       |
| 7374 | 054 | 6       |
| 7375 | 046 | .       |
| 7376 | 048 | 0       |
| 7377 | 050 | 2       |
| 7378 | 050 | 2       |
| 7379 | 049 | 1       |
| 7380 | 052 | 4       |
| 7381 | 049 | 1       |
| 7382 | 053 | 5       |
| 7383 | 101 | EE      |
| 7384 | 049 | 1       |
| 7385 | 054 | 6       |
| 7386 | 061 | =       |

Print [st+sr+sv]

|      |     |         |
|------|-----|---------|
| 7427 | 119 | print   |
| 7428 | 109 | RCL MEM |
| 7429 | 054 | 6       |
| 7430 | 049 | 1       |

Print cumulative -G/T

|      |     |         |
|------|-----|---------|
| 7471 | 119 | print   |
| 7472 | 042 | x       |
| 7473 | 109 | RCL MEM |
| 7474 | 048 | 0       |
| 7475 | 056 | 8       |
| 7476 | 061 | =       |

Print -G

|      |     |         |
|------|-----|---------|
| 7517 | 119 | print   |
| 7518 | 109 | RCL MEM |
| 7519 | 054 | 6       |
| 7520 | 050 | 2       |

Print cumulative H/T

|      |     |         |
|------|-----|---------|
| 7561 | 119 | print   |
| 7562 | 042 | x       |
| 7563 | 109 | RCL MEM |
| 7564 | 048 | 0       |
| 7565 | 056 | 8       |
| 7566 | 061 | =       |

Print cumulative H

|      |     |         |
|------|-----|---------|
| 7607 | 119 | print   |
| 7608 | 109 | RCL MEM |
| 7609 | 053 | 5       |
| 7610 | 051 | 3       |
| 7611 | 107 | STO MEM |
| 7612 | 051 | 3       |
| 7613 | 049 | 1       |
| 7614 | 048 | 0       |
| 7615 | 107 | STO MEM |
| 7616 | 053 | 5       |
| 7617 | 053 | 5       |
| 7618 | 107 | STO MEM |
| 7619 | 053 | 5       |
| 7620 | 052 | 4       |
| 7621 | 107 | STO MEM |
| 7622 | 053 | 5       |

|                    |     |         |
|--------------------|-----|---------|
| 7623               | 050 | 2       |
| 7624               | 107 | STO MEM |
| 7625               | 053 | 5       |
| 7626               | 049 | 1       |
| 7627               | 107 | STO MEM |
| 7628               | 053 | 5       |
| 7629               | 048 | 0       |
| 7630               | 107 | STO MEM |
| 7631               | 052 | 4       |
| 7632               | 057 | 9       |
| 7633               | 107 | STO MEM |
| 7634               | 049 | 1       |
| 7635               | 056 | 8       |
| 7636               | 107 | STO MEM |
| 7637               | 050 | 2       |
| 7638               | 048 | 0       |
| 7639               | 107 | STO MEM |
| 7640               | 050 | 2       |
| 7641               | 049 | 1       |
| 7642               | 107 | STO MEM |
| 7643               | 050 | 2       |
| 7644               | 050 | 2       |
| 7645               | 107 | STO MEM |
| 7646               | 050 | 2       |
| 7647               | 057 | 9       |
| 7648               | 107 | STO MEM |
| 7649               | 052 | 4       |
| 7650               | 050 | 2       |
| 7651               | 107 | STO MEM |
| 7652               | 052 | 4       |
| 7653               | 051 | 3       |
| 7654               | 107 | STO MEM |
| 7655               | 052 | 4       |
| 7656               | 052 | 4       |
| 7657               | 107 | STO MEM |
| 7658               | 052 | 4       |
| 7659               | 053 | 5       |
| 7660               | 107 | STO MEM |
| 7661               | 052 | 4       |
| 7662               | 054 | 6       |
| 7663               | 107 | STO MEM |
| 7664               | 052 | 4       |
| 7665               | 055 | 7       |
| 7666               | 107 | STO MEM |
| 7667               | 052 | 4       |
| 7668               | 056 | 8       |
| 7669               | 107 | STO MEM |
| 7670               | 054 | 6       |
| 7671               | 049 | 1       |
| 7672               | 107 | STO MEM |
| 7673               | 054 | 6       |
| 7674               | 050 | 2       |
| 7675               | 109 | RCL MEM |
| 7676               | 053 | 5       |
| 7677               | 051 | 3       |
| 7678               | 107 | STO MEM |
| 7679               | 051 | 3       |
| 7680               | 049 | 1       |
| Ex monatomic gases |     |         |
| 7721               | 044 | Reset   |





Turbine5/cal Vevor Turbine cgs  
 KE =  $IW^2/2$  I= $MR^2/2$  28/08/21 08/21  
 Revised 14/9/21  $e^{0.67}$  TbD  
 Revised 3/9/22 for symmetry factor 2  
 Estimate  $[Tw-Tb] \times \text{Radian/sec} = \text{Power}$   
 Radius of air cell say 1000 km  $10^8$   
 Tapered blade 2.3 to 11.5 cm  
 Radius is  $R+10$  cm + 1.0 cm up to 52 cm  
 Chord from 2.30 to 11.504 +0.1769/cm  
 Get KE and Vortical energy throughput  
 Revised 3/10/21  $mv^2$  for kT in vort en  
 0440 096 LABEL  
 0441 082 R  
 0442 107 STO MEM  
 0443 048 0  
 0444 049 1  
 0445 119 print  
 0446 002 HALT  
 Cell height H say 1000 m  $10^5$  cm  
 0487 096 LABEL  
 0488 072 H  
 0489 107 STO MEM  
 0490 048 0  
 0491 050 2  
 0492 119 print  
 0493 002 HALT  
 Angular velocity W radians/sec  
 0534 096 LABEL  
 0535 087 W  
 0536 107 STO MEM  
 0537 048 0  
 0538 051 3  
 0539 119 print  
 0540 002 HALT  
 Mean air density g/cm<sup>3</sup>  
 0581 096 LABEL  
 0582 068 D  
 0583 107 STO MEM  
 0584 048 0  
 0585 052 4  
 0586 119 print  
 0587 002 HALT  
 Area of wind blades  $A=L \times C$  cm<sup>2</sup>  
 0628 096 LABEL  
 0629 065 A  
 0630 107 STO MEM  
 0631 048 0  
 0632 053 5  
 0633 119 print  
 0634 002 HALT  
 Chord width of rotor blade cm  
 0675 096 LABEL  
 0676 067 C  
 0677 107 STO MEM  
 0678 048 0  
 0679 054 6  
 0680 119 print  
 0681 002 HALT  
 Angle of attack degrees  
 0722 096 LABEL

0723 079 0  
 0724 107 STO MEM  
 0725 048 0  
 0726 055 7  
 0727 119 print  
 0728 002 HALT  
 Length of rotor input L cm  
 0769 096 LABEL  
 0770 076 L  
 0771 107 STO MEM  
 0772 048 0  
 0773 056 8  
 0774 119 print  
 0775 002 HALT  
 Tip speed/wind ratio lambda  
 0816 096 LABEL  
 0817 083 S  
 0818 107 STO MEM  
 0819 048 0  
 0820 057 9  
 0821 119 print  
 0822 002 HALT  
 0823 096 LABEL  
 0824 088 X  
 Calculate max wind speed rw cm/sec  
 0865 040 (  
 0866 109 RCL MEM  
 0867 048 0  
 0868 049 1  
 0869 042 x  
 0870 109 RCL MEM  
 0871 048 0  
 0872 051 3  
 0873 041 )  
 Print max wind speed cm/sec  
 0914 119 print  
 0915 107 STO MEM  
 0916 049 1  
 0917 048 0  
 Caculate KE  
 Calculate volume cm<sup>3</sup>  
 0998 040 (  
 0999 112 pi  
 1000 042 x  
 1001 109 RCL MEM  
 1002 048 0  
 1003 049 1  
 1004 113 Square  
 1005 042 x  
 1006 109 RCL MEM  
 1007 048 0  
 1008 050 2  
 1009 041 )  
 Print vol cm<sup>3</sup> of air cell, stow m11  
 1050 119 print  
 1051 107 STO MEM  
 1052 049 1  
 1053 049 1  
 1054 040 (  
 1055 109 RCL MEM

|                                       |     |         |  |                                          |     |         |
|---------------------------------------|-----|---------|--|------------------------------------------|-----|---------|
| 1056                                  | 049 | 1       |  | 1272                                     | 042 | x       |
| 1057                                  | 049 | 1       |  | 1273                                     | 040 | (       |
| 1058                                  | 042 | x       |  | 1274                                     | 109 | RCL MEM |
| 1059                                  | 109 | RCL MEM |  | 1275                                     | 048 | 0       |
| 1060                                  | 048 | 0       |  | 1276                                     | 052 | 4       |
| 1061                                  | 052 | 4       |  | 1277                                     | 042 | x       |
| 1062                                  | 041 | )       |  | 1278                                     | 109 | RCL MEM |
| Print mass of air cell, stow m12 g    |     |         |  | 1279                                     | 049 | 1       |
| 1103                                  | 119 | print   |  | 1280                                     | 048 | 0       |
| 1104                                  | 107 | STO MEM |  | 1281                                     | 113 | Square  |
| 1105                                  | 049 | 1       |  | 1282                                     | 041 | )       |
| 1106                                  | 050 | 2       |  | 1283                                     | 041 | )       |
| 1107                                  | 040 | (       |  | 1284                                     | 047 | /       |
| 1108                                  | 109 | RCL MEM |  | 1285                                     | 050 | 2       |
| 1109                                  | 049 | 1       |  | 1286                                     | 041 | )       |
| 1110                                  | 050 | 2       |  | Print rate kinetic energy $P=DAV^{30.6}$ |     |         |
| 1111                                  | 042 | x       |  | 1327                                     | 119 | print   |
| 1112                                  | 109 | RCL MEM |  | 1328                                     | 042 | x       |
| 1113                                  | 048 | 0       |  | 1329                                     | 048 | 0       |
| 1114                                  | 049 | 1       |  | 1330                                     | 046 | .       |
| 1115                                  | 113 | Square  |  | 1331                                     | 054 | 6       |
| 1116                                  | 047 | /       |  | 1332                                     | 041 | )       |
| 1117                                  | 052 | 4       |  | Print adjustment for Cp                  |     |         |
| 1118                                  | 041 | )       |  | 1373                                     | 119 | print   |
| Print I and stow in m13               |     |         |  | Get vortical energy                      |     |         |
| 1159                                  | 119 | print   |  | 1414                                     | 107 | STO MEM |
| 1160                                  | 107 | STO MEM |  | 1415                                     | 049 | 1       |
| 1161                                  | 049 | 1       |  | 1416                                     | 052 | 4       |
| 1162                                  | 051 | 3       |  | 1417                                     | 040 | (       |
| 1163                                  | 040 | (       |  | 1418                                     | 040 | (       |
| 1164                                  | 109 | RCL MEM |  | 1419                                     | 040 | (       |
| 1165                                  | 049 | 1       |  | 1420                                     | 112 | pi      |
| 1166                                  | 051 | 3       |  | 1421                                     | 042 | x       |
| 1167                                  | 042 | x       |  | 1422                                     | 109 | RCL MEM |
| 1168                                  | 109 | RCL MEM |  | 1423                                     | 048 | 0       |
| 1169                                  | 048 | 0       |  | 1424                                     | 056 | 8       |
| 1170                                  | 051 | 3       |  | 1425                                     | 113 | Square  |
| 1171                                  | 113 | Square  |  | 1426                                     | 041 | )       |
| 1172                                  | 041 | )       |  | 1427                                     | 047 | /       |
| Print KE $IW^2$ of air cell, stow m14 |     |         |  | 1428                                     | 040 | (       |
| 1213                                  | 119 | print   |  | 1429                                     | 051 | 3       |
| 1214                                  | 107 | STO MEM |  | 1430                                     | 042 | x       |
| 1215                                  | 049 | 1       |  | 1431                                     | 109 | RCL MEM |
| 1216                                  | 052 | 4       |  | 1432                                     | 048 | 0       |
| Calculate KE, power of turbine volume |     |         |  | 1433                                     | 053 | 5       |
| 1257                                  | 040 | (       |  | 1434                                     | 041 | )       |
| 1258                                  | 040 | (       |  | 1435                                     | 041 | )       |
| 1259                                  | 040 | (       |  | 1436                                     | 119 | print   |
| 1260                                  | 040 | (       |  | 1437                                     | 114 | 1/x     |
| 1261                                  | 109 | RCL MEM |  | 1438                                     | 042 | x       |
| 1262                                  | 049 | 1       |  | 1439                                     | 109 | RCL MEM |
| 1263                                  | 048 | 0       |  | 1440                                     | 049 | 1       |
| 1264                                  | 042 | x       |  | 1441                                     | 052 | 4       |
| 1265                                  | 112 | pi      |  | 1442                                     | 041 | )       |
| 1266                                  | 042 | x       |  | 1443                                     | 119 | print   |
| 1267                                  | 109 | RCL MEM |  | 1444                                     | 040 | (       |
| 1268                                  | 048 | 0       |  | 1445                                     | 040 | (       |
| 1269                                  | 056 | 8       |  | 1446                                     | 040 | (       |
| 1270                                  | 113 | Square  |  | 1447                                     | 109 | RCL MEM |
| 1271                                  | 041 | )       |  | 1448                                     | 048 | 0       |



|                               |     |         |                            |     |         |
|-------------------------------|-----|---------|----------------------------|-----|---------|
| 1449                          | 049 | 1       | 1626                       | 046 | .       |
| 1450                          | 113 | Square  | 1627                       | 054 | 6       |
| 1451                          | 042 | x       | 1628                       | 055 | 7       |
| 1452                          | 109 | RCL MEM | 1629                       | 101 | EE      |
| 1453                          | 048 | 0       | 1630                       | 050 | 2       |
| 1454                          | 051 | 3       | 1631                       | 052 | 4       |
| 1455                          | 041 | )       | 1632                       | 111 | +/-     |
| 1456                          | 119 | print   | 1633                       | 041 | )       |
| 1457                          | 042 | x       | 1634                       | 042 | x       |
| 1458                          | 040 | (       | 1635                       | 109 | RCL MEM |
| 1459                          | 050 | 2       | 1636                       | 049 | 1       |
| 1460                          | 057 | 9       | 1637                       | 048 | 0       |
| 1461                          | 042 | x       | 1638                       | 113 | Square  |
| 1462                          | 049 | 1       | 1639                       | 041 | )       |
| 1463                          | 046 | .       | 1640                       | 107 | STD MEM |
| 1464                          | 054 | 6       | 1641                       | 057 | 9       |
| 1465                          | 055 | 7       | 1642                       | 049 | 1       |
| 1466                          | 101 | EE      | Print mv^2                 |     |         |
| 1467                          | 050 | 2       | 1683                       | 119 | print   |
| 1468                          | 052 | 4       | 1684                       | 041 | )       |
| 1469                          | 111 | +/-     | Print mv^2lnnv             |     |         |
| 1470                          | 041 | )       | 1725                       | 119 | print   |
| 1471                          | 047 | /       | 1726                       | 041 | )       |
| 1472                          | 050 | 2       | 1727                       | 107 | STD MEM |
| 1473                          | 041 | )       | 1728                       | 056 | 8       |
| Print mrv/2 for symmetry      |     |         | 1729                       | 049 | 1       |
| 1514                          | 119 | print   | 1730                       | 040 | (       |
| 1515                          | 047 | /       | 1731                       | 109 | RCL MEM |
| 1516                          | 049 | 1       | 1732                       | 056 | 8       |
| 1517                          | 046 | .       | 1733                       | 049 | 1       |
| 1518                          | 048 | 0       | 1734                       | 047 | /       |
| 1519                          | 053 | 5       | 1735                       | 109 | RCL MEM |
| 1520                          | 052 | 4       | 1736                       | 056 | 8       |
| 1521                          | 101 | EE      | 1737                       | 048 | 0       |
| 1522                          | 050 | 2       | 1738                       | 041 | )       |
| 1523                          | 055 | 7       | Print hvv vortical quantum |     |         |
| 1524                          | 111 | +/-     | 1779                       | 119 | print   |
| 1525                          | 047 | /       | 1780                       | 047 | /       |
| 1526                          | 050 | 2       | 1781                       | 054 | 6       |
| 1527                          | 041 | )       | 1782                       | 046 | .       |
| Print nv using symmetry no. 2 |     |         | 1783                       | 054 | 6       |
| 1568                          | 119 | print   | 1784                       | 050 | 2       |
| 1569                          | 107 | STD MEM | 1785                       | 054 | 6       |
| 1570                          | 056 | 8       | 1786                       | 049 | 1       |
| 1571                          | 048 | 0       | 1787                       | 101 | EE      |
| Get mv^2lnnv                  |     |         | 1788                       | 050 | 2       |
| 1612                          | 040 | (       | 1789                       | 055 | 7       |
| 1613                          | 040 | (       | 1790                       | 111 | +/-     |
| 1614                          | 109 | RCL MEM | 1791                       | 041 | )       |
| 1615                          | 056 | 8       | Print v frequency          |     |         |
| 1616                          | 048 | 0       | 1832                       | 119 | print   |
| 1617                          | 110 | LOG e   | 1833                       | 114 | 1/x     |
| 1618                          | 119 | print   | 1834                       | 042 | x       |
| 1619                          | 042 | x       | 1835                       | 050 | 2       |
| 1620                          | 040 | (       | 1836                       | 046 | .       |
| 1621                          | 040 | (       | 1837                       | 057 | 9       |
| 1622                          | 050 | 2       | 1838                       | 057 | 9       |
| 1623                          | 057 | 9       | 1839                       | 055 | 7       |
| 1624                          | 042 | x       | 1840                       | 057 | 9       |
| 1625                          | 049 | 1       | 1841                       | 101 | EE      |

|                                      |     |         |                                        |                        |         |
|--------------------------------------|-----|---------|----------------------------------------|------------------------|---------|
| 1842                                 | 049 | 1       | 2097                                   | 050                    | 2       |
| 1843                                 | 048 | 0       | 2098                                   | 042                    | x       |
| 1844                                 | 041 | )       | 2099                                   | 109                    | RCL MEM |
| Print Y wavelength                   |     |         | 2100                                   | 048                    | 0       |
| 1885                                 | 119 | print   | 2101                                   | 053                    | 5       |
| 1886                                 | 040 | (       | 2102                                   | 042                    | x       |
| 1887                                 | 040 | (       | 2103                                   | 051                    | 3       |
| 1888                                 | 049 | 1       | 2104                                   | 041                    | )       |
| 1889                                 | 046 | .       | Print vortical                         | power total blade area |         |
| 1890                                 | 050 | 2       | 2145                                   | 119                    | print   |
| 1891                                 | 050 | 2       | 2146                                   | 107                    | STO MEM |
| 1892                                 | 053 | 5       | 2147                                   | 056                    | 8       |
| 1893                                 | 101 | EE      | 2148                                   | 051                    | 3       |
| 1894                                 | 051 | 3       | Get T                                  |                        |         |
| 1895                                 | 111 | +/-     | 2189                                   | 040                    | (       |
| 1896                                 | 047 | /       | 2190                                   | 109                    | RCL MEM |
| 1897                                 | 040 | (       | 2191                                   | 057                    | 9       |
| 1898                                 | 050 | 2       | 2192                                   | 049                    | 1       |
| 1899                                 | 057 | 9       | 2193                                   | 047                    | /       |
| 1900                                 | 042 | x       | 2194                                   | 040                    | (       |
| 1901                                 | 049 | 1       | 2195                                   | 049                    | 1       |
| 1902                                 | 046 | .       | 2196                                   | 046                    | .       |
| 1903                                 | 054 | 6       | 2197                                   | 051                    | 3       |
| 1904                                 | 055 | 7       | 2198                                   | 056                    | 8       |
| 1905                                 | 101 | EE      | 2199                                   | 048                    | 0       |
| 1906                                 | 050 | 2       | 2200                                   | 054                    | 6       |
| 1907                                 | 052 | 4       | 2201                                   | 101                    | EE      |
| 1908                                 | 111 | +/-     | 2202                                   | 049                    | 1       |
| 1909                                 | 041 | )       | 2203                                   | 054                    | 6       |
| 1910                                 | 041 | )       | 2204                                   | 111                    | +/-     |
| Print N per cm^3                     |     |         | 2205                                   | 042                    | x       |
| 1951                                 | 119 | print   | 2206                                   | 051                    | 3       |
| 1952                                 | 042 | x       | 2207                                   | 041                    | )       |
| 1953                                 | 109 | RCL MEM | 2208                                   | 041                    | )       |
| 1954                                 | 056 | 8       | Print Torque/Temperature               |                        |         |
| 1955                                 | 049 | 1       | 2249                                   | 119                    | print   |
| 1956                                 | 041 | )       | Get thrust per rotor blade @ 0 degrees |                        |         |
| 1957                                 | 119 | print   | 2290                                   | 040                    | (       |
| Print ergs/cm^3 or vortical pressure |     |         | 2291                                   | 109                    | RCL MEM |
| 1998                                 | 107 | STO MEM | 2292                                   | 048                    | 0       |
| 1999                                 | 056 | 8       | 2293                                   | 053                    | 5       |
| 2000                                 | 049 | 1       | 2294                                   | 042                    | x       |
| 2001                                 | 040 | (       | 2295                                   | 040                    | (       |
| 2002                                 | 109 | RCL MEM | 2296                                   | 109                    | RCL MEM |
| 2003                                 | 056 | 8       | 2297                                   | 048                    | 0       |
| 2004                                 | 049 | 1       | 2298                                   | 055                    | 7       |
| 2005                                 | 042 | x       | 2299                                   | 115                    | Sine    |
| 2006                                 | 109 | RCL MEM | 2300                                   | 041                    | )       |
| 2007                                 | 049 | 1       | 2301                                   | 042                    | x       |
| 2008                                 | 048 | 0       | 2302                                   | 109                    | RCL MEM |
| 2009                                 | 041 | )       | 2303                                   | 049                    | 1       |
| Print power pe/cm^2                  |     |         | 2304                                   | 048                    | 0       |
| 2050                                 | 119 | print   | 2305                                   | 041                    | )       |
| 2051                                 | 107 | STO MEM | Print Asin0 x v = volume per sec       |                        |         |
| 2052                                 | 056 | 8       | 2346                                   | 119                    | print   |
| 2053                                 | 050 | 2       | 2347                                   | 107                    | STO MEM |
| Get power for 3 blades and area      |     |         | 2348                                   | 049                    | 1       |
| 2094                                 | 040 | (       | 2349                                   | 053                    | 5       |
| 2095                                 | 109 | RCL MEM | 2350                                   | 040                    | (       |
| 2096                                 | 056 | 8       | 2351                                   | 109                    | RCL MEM |



```

2352 049 1
2353 053 5
2354 042 x
2355 109 RCL MEM
2356 048 0
2357 052 4
2358 042 x
2359 109 RCL MEM
2360 049 1
2361 048 0
2362 113 Square
2363 047 /
2364 050 2
2365 041 )
Print MAsinDv^2/2 KE impact on blade
2406 119 print
2407 107 STO MEM
2408 049 1
2409 054 6
Calculate SumMvsinD/sec force/blade
2450 040 (
2451 109 RCL MEM
2452 049 1
2453 053 5
2454 042 x
2455 109 RCL MEM
2456 048 0
2457 052 4
2458 042 x
2459 109 RCL MEM
2460 049 1
2461 048 0
2462 041 )
Print, stow total impact SumMvsinD/sec
2503 119 print
2504 107 STO MEM
2505 049 1
2506 055 7
Calculate Torque and anti-Torque-heat
2547 040 (
2548 040 (
2549 109 RCL MEM
2550 049 1
2551 055 7
2552 047 /
2553 109 RCL MEM
2554 048 0
2555 053 5
2556 041 )
2557 107 STO MEM
2558 049 1
2559 055 7
2560 041 )
2561 119 print
2562 107 STO MEM
2563 049 1
2564 055 7
2565 040 (
2566 050 2
2567 046 .

```

```

2568 051 3
2569 048 0
Print tip chord
2610 119 print
2611 107 STO MEM
2612 048 0
2613 054 6
Print tip width
2654 119 print
2655 109 RCL MEM
2656 048 0
2657 056 8
2658 107 STO MEM
2659 048 0
2660 048 0
2661 119 print
Get Tw and Tb
2702 096 LABEL
2703 084 T
2704 040 (
2705 040 (
2706 048 0
2707 046 .
2708 049 1
2709 055 7
2710 054 6
2711 057 9
2712 117 SUM MEM
2713 048 0
2714 054 6
2715 041 )
2716 040 (
2717 109 RCL MEM
2718 049 1
2719 055 7
2720 042 x
2721 109 RCL MEM
2722 048 0
2723 054 6
2724 041 )
2725 041 )
Print MvsinD/sec force/metre blade
2766 107 STO MEM
2767 049 1
2768 056 8
2769 040 (
2770 040 (
2771 050 2
2772 042 x
2773 109 RCL MEM
2774 048 0
2775 055 7
2776 041 )
2777 115 Sine
2778 042 x
2779 109 RCL MEM
2780 049 1
2781 056 8
2782 041 )
SMvsinDcos2D/metresec, action/area/sec

```



|                                       |     |         |                                      |     |          |
|---------------------------------------|-----|---------|--------------------------------------|-----|----------|
| 2823                                  | 107 | STD MEM | 3156                                 | 041 | )        |
| 2824                                  | 049 | 1       | 3157                                 | 041 | )        |
| 2825                                  | 056 | 8       | Get RW of blade at R and stow        |     |          |
| Label Torque or rate of Action        |     |         | 3198                                 | 113 | Square   |
| Get SumRotor Windward Torque Tw       |     |         | 3199                                 | 041 | )        |
| 2906                                  | 040 | (       | RVd0/sec                             |     |          |
| 2907                                  | 109 | RCL MEM | 3240                                 | 107 | STD MEM  |
| 2908                                  | 049 | 1       | 3241                                 | 051 | 3        |
| 2909                                  | 056 | 8       | 3242                                 | 048 | 0        |
| 2910                                  | 042 | x       | 3243                                 | 040 | (        |
| 2911                                  | 040 | (       | 3244                                 | 040 | (        |
| 2912                                  | 109 | RCL MEM | 3245                                 | 040 | (        |
| 2913                                  | 048 | 0       | Get blade area dRcost segment at R   |     |          |
| 2914                                  | 048 | 0       | 3286                                 | 109 | RCL MEM  |
| 2915                                  | 043 | +       | 3287                                 | 048 | 0        |
| 2916                                  | 049 | 1       | 3288                                 | 055 | 7        |
| 2917                                  | 048 | 0       | 3289                                 | 099 | Cosine   |
| 2918                                  | 041 | )       | 3290                                 | 042 | x        |
| 2919                                  | 042 | x       | 3291                                 | 109 | RCL MEM  |
| 2920                                  | 051 | 3       | 3292                                 | 048 | 0        |
| 2921                                  | 041 | )       | 3293                                 | 054 | 6        |
| 2922                                  | 041 | )       | 3294                                 | 041 | )        |
| Get cumulative Tw                     |     |         | 3295                                 | 042 | x        |
| 2963                                  | 117 | SUM MEM | Get inertia MR/sec, power MR^20m^2   |     |          |
| 2964                                  | 049 | 1       | Use 2-D density D^2/3 for Tw output  |     |          |
| 2965                                  | 057 | 9       | 3376                                 | 040 | (        |
| Get integrated torque or rate action  |     |         | 3377                                 | 109 | RCL MEM  |
| SumMvsin0cos20/metre sec; SumFxR=Tb   |     |         | 3378                                 | 048 | 0        |
| Get rotor reverse torque, action rate |     |         | 3379                                 | 052 | 4        |
| 3086                                  | 040 | (       | 3380                                 | 091 | Exponent |
| 3087                                  | 040 | (       | 3381                                 | 048 | 0        |
| 3088                                  | 109 | RCL MEM | 3382                                 | 046 | .        |
| 3089                                  | 049 | 1       | 3383                                 | 054 | 6        |
| 3090                                  | 048 | 0       | 3384                                 | 055 | 7        |
| 3091                                  | 042 | x       | 3385                                 | 042 | x        |
| 3092                                  | 109 | RCL MEM | 3386                                 | 109 | RCL MEM  |
| 3093                                  | 048 | 0       | 3387                                 | 051 | 3        |
| 3094                                  | 057 | 9       | 3388                                 | 048 | 0        |
| 3095                                  | 041 | )       | 3389                                 | 041 | )        |
| 3096                                  | 047 | /       | 3390                                 | 041 | )        |
| 3097                                  | 109 | RCL MEM | 3391                                 | 047 | /        |
| 3098                                  | 048 | 0       | 3392                                 | 109 | RCL MEM  |
| 3099                                  | 056 | 8       | 3393                                 | 050 | 2        |
| 3100                                  | 041 | )       | 3394                                 | 048 | 0        |
| Stow rotor W                          |     |         | 3395                                 | 041 | )        |
| 3141                                  | 107 | STD MEM | 3396                                 | 042 | x        |
| 3142                                  | 050 | 2       | 3397                                 | 051 | 3        |
| 3143                                  | 048 | 0       | 3398                                 | 041 | )        |
| 3144                                  | 040 | (       | Get SumMV^2cos0=MRVd0/dt=MV^2 = HEAT |     |          |
| 3145                                  | 109 | RCL MEM | 3439                                 | 117 | SUM MEM  |
| 3146                                  | 050 | 2       | 3440                                 | 050 | 2        |
| 3147                                  | 048 | 0       | 3441                                 | 049 | 1        |
| 3148                                  | 042 | x       | Print total back torque, action/sec  |     |          |
| 3149                                  | 040 | (       | 3482                                 | 039 | Dec JPNZ |
| 3150                                  | 109 | RCL MEM | 3483                                 | 084 | T        |
| 3151                                  | 048 | 0       | 3484                                 | 040 | (        |
| 3152                                  | 048 | 0       | 3485                                 | 109 | RCL MEM  |
| 3153                                  | 043 | +       | 3486                                 | 049 | 1        |
| 3154                                  | 049 | 1       | 3487                                 | 057 | 9        |
| 3155                                  | 048 | 0       | 3488                                 | 119 | print    |

|                |                        |         |       |                                |         |
|----------------|------------------------|---------|-------|--------------------------------|---------|
| 3489           | 045                    | -       | 3590  | 107                            | STO MEM |
| 3490           | 109                    | RCL MEM | 3591  | 050                            | 2       |
| 3491           | 050                    | 2       | 3592  | 051                            | 3       |
| 3492           | 049                    | 1       | 3593  | 109                            | RCL MEM |
| 3493           | 119                    | print   | 3594  | 048                            | 0       |
| 3494           | 041                    | )       | 3595  | 054                            | 6       |
| Print and stow | 3-rotor net Torque     |         | 3596  | 119                            | print   |
| 3535           | 119                    | print   | Clear | cumulative memories for reruns |         |
| 3536           | 107                    | STO MEM | 3637  | 048                            | 0       |
| 3537           | 050                    | 2       | 3638  | 107                            | STO MEM |
| 3538           | 050                    | 2       | 3639  | 048                            | 0       |
| 3539           | 040                    | (       | 3640  | 054                            | 6       |
| 3540           | 109                    | RCL MEM | 3641  | 107                            | STO MEM |
| 3541           | 050                    | 2       | 3642  | 049                            | 1       |
| 3542           | 050                    | 2       | 3643  | 057                            | 9       |
| 3543           | 042                    | x       | 3644  | 107                            | STO MEM |
| 3544           | 109                    | RCL MEM | 3645  | 050                            | 2       |
| 3545           | 050                    | 2       | 3646  | 049                            | 1       |
| 3546           | 048                    | 0       | 3647  | 107                            | STO MEM |
| 3547           | 119                    | print   | 3648  | 050                            | 2       |
| 3548           | 041                    | )       | 3649  | 050                            | 2       |
| Print and stow | net Power per windmill |         | 3650  | 002                            | HALT    |
| 3589           | 119                    | print   |       |                                |         |

|                                              |                                                |                       |         |
|----------------------------------------------|------------------------------------------------|-----------------------|---------|
| TROPCYC2                                     | 0528                                           | 002                   | HALT    |
| Revised Sep 1 2022 for symmetry 2            | Evaporation                                    | mm/day/m <sup>2</sup> | 25 mm   |
| Model 500 km, 50 km ew, r <sup>2</sup> w 5E6 | 0569                                           | 096                   | LABEL   |
| Get cyclone energy vortical and torque       | 0570                                           | 069                   | E       |
| Hold r <sup>2</sup> w constant, least action | 0571                                           | 107                   | STO MEM |
| Iterations 10                                | 0572                                           | 048                   | 0       |
| 0240 096 LABEL                               | 0573                                           | 056                   | 8       |
| 0241 073 I                                   | 0574                                           | 119                   | print   |
| 0242 107 STO MEM                             | Degrees latitude L, say 17° Cairns             |                       |         |
| 0243 048 0                                   | 0615 096 LABEL                                 |                       |         |
| 0244 049 1                                   | 0616 076 L                                     |                       |         |
| 0245 119 print                               | 0617 107 STO MEM                               |                       |         |
| 0246 002 HALT                                | 0618 048 0                                     |                       |         |
| Radius say 5E5 500 km                        | 0619 057 9                                     |                       |         |
| 0287 096 LABEL                               | 0620 119 print                                 |                       |         |
| 0288 082 R                                   | 0621 002 HALT                                  |                       |         |
| 0289 107 STO MEM                             | Execute                                        |                       |         |
| 0290 048 0                                   | 0662 096 LABEL                                 |                       |         |
| 0291 050 2                                   | 0663 088 X                                     |                       |         |
| 0292 119 print                               | Stow Earth radius                              |                       |         |
| 0293 002 HALT                                | 0704 040 (                                     |                       |         |
| Eyewall barrier radius B 5E4                 | 0705 054 6                                     |                       |         |
| 0334 096 LABEL                               | 0706 046 .                                     |                       |         |
| 0335 066 B                                   | 0707 051 3                                     |                       |         |
| 0336 107 STO MEM                             | 0708 055 7                                     |                       |         |
| 0337 048 0                                   | 0709 049 1                                     |                       |         |
| 0338 051 3                                   | 0710 101 EE                                    |                       |         |
| 0339 119 print                               | 0711 054 6                                     |                       |         |
| 0340 002 HALT                                | 0712 041 )                                     |                       |         |
| Height effective in mass content 5E3         | 0713 119 print                                 |                       |         |
| 0381 096 LABEL                               | 0714 107 STO MEM                               |                       |         |
| 0382 072 H                                   | 0715 049 1                                     |                       |         |
| 0383 107 STO MEM                             | 0716 048 0                                     |                       |         |
| 0384 048 0                                   | Estimate heat evaporation /m <sup>2</sup> /sec |                       |         |
| 0385 052 4                                   | 2.26 MJ/kg heat evaporation                    |                       |         |
| 0386 119 print                               | 1 mm/m <sup>2</sup> is kg water                |                       |         |
| 0387 002 HALT                                | 0837 040 (                                     |                       |         |
| Angular velocity radians/sec                 | 0838 109 RCL MEM                               |                       |         |
| 0428 096 LABEL                               | 0839 048 0                                     |                       |         |
| 0429 087 W                                   | 0840 056 8                                     |                       |         |
| 0430 107 STO MEM                             | 0841 119 print                                 |                       |         |
| 0431 048 0                                   | 0842 107 STO MEM                               |                       |         |
| 0432 053 5                                   | 0843 053 5                                     |                       |         |
| 0433 119 print                               | 0844 048 0                                     |                       |         |
| 0434 002 HALT                                | 0845 040 (                                     |                       |         |
| Action specific r <sup>2</sup> w 5E6         | 0846 109 RCL MEM                               |                       |         |
| 0475 096 LABEL                               | 0847 053 5                                     |                       |         |
| 0476 065 A                                   | 0848 048 0                                     |                       |         |
| 0477 107 STO MEM                             | 0849 042 x                                     |                       |         |
| 0478 048 0                                   | 0850 050 2                                     |                       |         |
| 0479 054 6                                   | 0851 046 .                                     |                       |         |
| 0480 119 print                               | 0852 050 2                                     |                       |         |
| 0481 002 HALT                                | 0853 054 6                                     |                       |         |
| Density of air kg/m <sup>3</sup> 1.225       | 0854 101 EE                                    |                       |         |
| 0522 096 LABEL                               | 0855 048 0                                     |                       |         |
| 0523 068 D                                   | 0856 054 6                                     |                       |         |
| 0524 107 STO MEM                             | 0857 041 )                                     |                       |         |
| 0525 048 0                                   | Print and stow J/m <sup>2</sup> /s latent heat |                       |         |
| 0526 055 7                                   | 0898 119 print                                 |                       |         |
| 0527 119 print                               | 0899 117 SUM MEM                               |                       |         |



```

0900 053 5
0901 049 1
0902 040 (
0903 109 RCL MEM
0904 053 5
0905 049 1
0906 042 x
0907 056 8
0908 054 6
0909 052 4
0910 048 0
0911 048 0
0912 041 )
Print and stow J/m^2/day
0953 119 print
0954 117 SUM MEM
0955 053 5
0956 050 2
0957 109 RCL MEM
0958 048 0
0959 049 1
0960 107 STO MEM
0961 048 0
0962 048 0
Print number iterations
1003 119 print
1004 096 LABEL
1005 089 Y
Get vortical torque and Gibbs energy
Get specific action r^2w
1086 040 (
1087 109 RCL MEM
1088 048 0
1089 054 6
Print specific action
1130 119 print
1131 047 /
1132 040 (
1133 109 RCL MEM
1134 048 0
1135 051 3
1136 042 x
1137 109 RCL MEM
1138 048 0
1139 048 0
1140 119 print
Print m00
1181 041 )
Print current radius
1222 119 print
1223 107 STO MEM
1224 048 0
1225 050 2
1226 041 )
Print and stow current velocity rw
1267 119 print
1268 107 STO MEM
1269 053 5
1270 051 3
Get torque mv^2=mr^2wdphi/dt

```

```

1311 040 (
1312 050 2
1313 057 9
1314 042 x
1315 049 1
1316 046 .
1317 054 6
1318 055 7
1319 101 EE
1320 050 2
1321 055 7
1322 111 +/-
1323 042 x
1324 109 RCL MEM
1325 053 5
1326 051 3
1327 113 Square
1328 041 )
Print and stow mv^2 torque
1369 119 print
1370 107 STO MEM
1371 053 5
1372 052 4
Get inertial acceleration rw^2
1413 040 (
1414 109 RCL MEM
1415 048 0
1416 054 6
1417 113 Square
1418 047 /
1419 109 RCL MEM
1420 048 0
1421 050 2
1422 091 Exponent
1423 051 3
1424 041 )
Print, stow rw^2 inertial acceleration
1465 119 print
1466 107 STO MEM
1467 052 4
1468 055 7
Get Coriolis acceleration at 8 degrees
1509 040 (
1510 040 (
1511 050 2
1512 042 x
1513 112 pi
1514 042 x
1515 109 RCL MEM
1516 049 1
1517 048 0
1518 041 )
1519 047 /
1520 056 8
1521 054 6
1522 052 4
1523 048 0
1524 048 0
1525 041 )
Print deltaphi/sec

```

|                                  |     |         |                                   |     |         |
|----------------------------------|-----|---------|-----------------------------------|-----|---------|
| 1566                             | 119 | print   | 1743                              | 109 | RCL MEM |
| 1567                             | 107 | STD MEM | 1744                              | 052 | 4       |
| 1568                             | 052 | 4       | 1745                              | 055 | 7       |
| 1569                             | 056 | 8       | 1746                              | 047 | /       |
| 1570                             | 040 | (       | 1747                              | 109 | RCL MEM |
| 1571                             | 109 | RCL MEM | 1748                              | 052 | 4       |
| 1572                             | 052 | 4       | 1749                              | 048 | 0       |
| 1573                             | 056 | 8       | 1750                              | 041 | )       |
| 1574                             | 047 | /       | Print ratio                       |     |         |
| 1575                             | 109 | RCL MEM | 1791                              | 119 | print   |
| 1576                             | 049 | 1       | Get second ratio                  |     |         |
| 1577                             | 048 | 0       | 1832                              | 040 | (       |
| 1578                             | 041 | )       | 1833                              | 109 | RCL MEM |
| 1579                             | 119 | print   | 1834                              | 052 | 4       |
| 1580                             | 113 | Square  | 1835                              | 055 | 7       |
| 1581                             | 107 | STD MEM | 1836                              | 047 | /       |
| 1582                             | 052 | 4       | 1837                              | 109 | RCL MEM |
| 1583                             | 057 | 9       | 1838                              | 052 | 4       |
| 1584                             | 040 | (       | 1839                              | 049 | 1       |
| 1585                             | 109 | RCL MEM | 1840                              | 041 | )       |
| 1586                             | 052 | 4       | Print second ratio                |     |         |
| 1587                             | 057 | 9       | 1881                              | 119 | print   |
| 1588                             | 042 | x       | Get action and nv                 |     |         |
| 1589                             | 109 | RCL MEM | 1922                              | 040 | (       |
| 1590                             | 049 | 1       | 1923                              | 109 | RCL MEM |
| 1591                             | 048 | 0       | 1924                              | 048 | 0       |
| 1592                             | 042 | x       | 1925                              | 054 | 6       |
| 1593                             | 109 | RCL MEM | 1926                              | 042 | x       |
| 1594                             | 048 | 0       | 1927                              | 050 | 2       |
| 1595                             | 057 | 9       | 1928                              | 057 | 9       |
| 1596                             | 099 | Cosine  | 1929                              | 042 | x       |
| 1597                             | 041 | )       | 1930                              | 049 | 1       |
| Print, stow Coriolis accleration |     |         | 1931                              | 046 | .       |
| 1638                             | 119 | print   | 1932                              | 054 | 6       |
| 1639                             | 107 | STD MEM | 1933                              | 055 | 7       |
| 1640                             | 052 | 4       | 1934                              | 101 | EE      |
| 1641                             | 048 | 0       | 1935                              | 050 | 2       |
| 1642                             | 040 | (       | 1936                              | 055 | 7       |
| 1643                             | 109 | RCL MEM | 1937                              | 111 | +/-     |
| 1644                             | 048 | 0       | Divide by symmetry factor 2       |     |         |
| 1645                             | 057 | 9       | 1978                              | 047 | /       |
| 1646                             | 115 | Sine    | 1979                              | 050 | 2       |
| 1647                             | 042 | x       | 1980                              | 041 | )       |
| 1648                             | 109 | RCL MEM | Print and stow action/molecule=@v |     |         |
| 1649                             | 052 | 4       | 2021                              | 119 | print   |
| 1650                             | 057 | 9       | 2022                              | 107 | STD MEM |
| 1651                             | 042 | x       | 2023                              | 053 | 5       |
| 1652                             | 050 | 2       | 2024                              | 053 | 5       |
| 1653                             | 042 | x       | 2025                              | 040 | (       |
| 1654                             | 109 | RCL MEM | 2026                              | 109 | RCL MEM |
| 1655                             | 049 | 1       | 2027                              | 053 | 5       |
| 1656                             | 048 | 0       | 2028                              | 053 | 5       |
| 1657                             | 041 | )       | 2029                              | 047 | /       |
| Print and stow 2Wrwsin(phi)      |     |         | 2030                              | 049 | 1       |
| 1698                             | 119 | print   | 2031                              | 046 | .       |
| 1699                             | 107 | STD MEM | 2032                              | 048 | 0       |
| 1700                             | 052 | 4       | 2033                              | 053 | 5       |
| 1701                             | 049 | 1       | 2034                              | 052 | 4       |
| Get ratio inertial/Coriolis      |     |         | 2035                              | 053 | 5       |
| 1742                             | 040 | (       | 2036                              | 055 | 7       |



|      |     |     |
|------|-----|-----|
| 2037 | 051 | 3   |
| 2038 | 101 | EE  |
| 2039 | 051 | 3   |
| 2040 | 052 | 4   |
| 2041 | 111 | +/- |
| 2042 | 041 | )   |

Print and stow quantum number nv

|      |     |         |
|------|-----|---------|
| 2083 | 119 | print   |
| 2084 | 107 | STO MEM |
| 2085 | 053 | 5       |
| 2086 | 054 | 6       |

Get -g Gibbs field energy

|      |     |         |
|------|-----|---------|
| 2127 | 040 | (       |
| 2128 | 109 | RCL MEM |
| 2129 | 053 | 5       |
| 2130 | 054 | 6       |
| 2131 | 110 | LOG e   |
| 2132 | 119 | print   |
| 2133 | 042 | x       |
| 2134 | 109 | RCL MEM |
| 2135 | 053 | 5       |
| 2136 | 052 | 4       |
| 2137 | 041 | )       |

Print and stow mv^2lnnv -gv

|      |     |         |
|------|-----|---------|
| 2178 | 119 | print   |
| 2179 | 107 | STO MEM |
| 2180 | 053 | 5       |
| 2181 | 055 | 7       |
| 2182 | 040 | (       |
| 2183 | 109 | RCL MEM |
| 2184 | 053 | 5       |
| 2185 | 055 | 7       |
| 2186 | 047 | /       |
| 2187 | 109 | RCL MEM |
| 2188 | 053 | 5       |
| 2189 | 052 | 4       |
| 2190 | 041 | )       |

Print ratio -gv/mv^2/torque

|      |     |         |
|------|-----|---------|
| 2231 | 119 | print   |
| 2232 | 040 | (       |
| 2233 | 109 | RCL MEM |
| 2234 | 053 | 5       |
| 2235 | 055 | 7       |
| 2236 | 047 | /       |
| 2237 | 109 | RCL MEM |
| 2238 | 053 | 5       |
| 2239 | 054 | 6       |
| 2240 | 041 | )       |

Print hv vortical quantum, stow

|      |     |         |
|------|-----|---------|
| 2281 | 119 | print   |
| 2282 | 107 | STO MEM |
| 2283 | 053 | 5       |
| 2284 | 056 | 8       |
| 2285 | 040 | (       |
| 2286 | 109 | RCL MEM |
| 2287 | 053 | 5       |
| 2288 | 056 | 8       |
| 2289 | 047 | /       |
| 2290 | 054 | 6       |
| 2291 | 046 | .       |

|      |     |     |
|------|-----|-----|
| 2292 | 054 | 6   |
| 2293 | 050 | 2   |
| 2294 | 054 | 6   |
| 2295 | 049 | 1   |
| 2296 | 101 | EE  |
| 2297 | 051 | 3   |
| 2298 | 052 | 4   |
| 2299 | 111 | +/- |
| 2300 | 041 | )   |

Print v frequency

|      |     |       |
|------|-----|-------|
| 2341 | 119 | print |
| 2342 | 114 | 1/x   |
| 2343 | 042 | x     |
| 2344 | 050 | 2     |
| 2345 | 046 | .     |
| 2346 | 057 | 9     |
| 2347 | 057 | 9     |
| 2348 | 055 | 7     |
| 2349 | 057 | 9     |
| 2350 | 050 | 2     |
| 2351 | 052 | 4     |
| 2352 | 053 | 5     |
| 2353 | 056 | 8     |
| 2354 | 101 | EE    |
| 2355 | 048 | 0     |
| 2356 | 056 | 8     |
| 2357 | 041 | )     |

Print Y wavelength

2398 119 print

Get N/m^3

|      |     |         |
|------|-----|---------|
| 2439 | 040 | (       |
| 2440 | 109 | RCL MEM |
| 2441 | 048 | 0       |
| 2442 | 055 | 7       |
| 2443 | 047 | /       |
| 2444 | 040 | (       |
| 2445 | 050 | 2       |
| 2446 | 057 | 9       |
| 2447 | 042 | x       |
| 2448 | 049 | 1       |
| 2449 | 046 | .       |
| 2450 | 054 | 6       |
| 2451 | 055 | 7       |
| 2452 | 101 | EE      |
| 2453 | 050 | 2       |
| 2454 | 055 | 7       |
| 2455 | 111 | +/-     |
| 2456 | 041 | )       |
| 2457 | 041 | )       |

Print N/m^3

|      |     |         |
|------|-----|---------|
| 2498 | 119 | print   |
| 2499 | 107 | STO MEM |
| 2500 | 053 | 5       |
| 2501 | 057 | 9       |
| 2502 | 040 | (       |
| 2503 | 040 | (       |
| 2504 | 109 | RCL MEM |
| 2505 | 053 | 5       |
| 2506 | 057 | 9       |
| 2507 | 042 | x       |



|                                              |     |         |                                                      |     |         |
|----------------------------------------------|-----|---------|------------------------------------------------------|-----|---------|
| 2508                                         | 109 | RCL MEM | 2802                                                 | 054 | 6       |
| 2509                                         | 053 | 5       | 2803                                                 | 052 | 4       |
| 2510                                         | 055 | 7       | 2804                                                 | 109 | RCL MEM |
| 2511                                         | 041 | )       | 2805                                                 | 054 | 6       |
| Print J/m <sup>3</sup> vortical pressure     |     |         | 2806                                                 | 052 | 4       |
| 2552                                         | 119 | print   | 2807                                                 | 119 | print   |
| 2553                                         | 042 | x       | 2808                                                 | 040 | (       |
| 2554                                         | 049 | 1       | 2809                                                 | 109 | RCL MEM |
| 2555                                         | 101 | EE      | 2810                                                 | 053 | 5       |
| 2556                                         | 057 | 9       | 2811                                                 | 052 | 4       |
| 2557                                         | 041 | )       | 2812                                                 | 047 | /       |
| Print J/km <sup>3</sup> vortical pressure    |     |         | 2813                                                 | 050 | 2       |
| 2598                                         | 119 | print   | 2814                                                 | 042 | x       |
| 2599                                         | 107 | STO MEM | 2815                                                 | 109 | RCL MEM |
| 2600                                         | 054 | 6       | 2816                                                 | 053 | 5       |
| 2601                                         | 048 | 0       | 2817                                                 | 057 | 9       |
| Get cell height J/km <sup>3</sup>            |     |         | 2818                                                 | 041 | )       |
| 2642                                         | 040 | (       | Print and stow kinetic/m <sup>3</sup>                |     |         |
| 2643                                         | 109 | RCL MEM | 2859                                                 | 119 | print   |
| 2644                                         | 054 | 6       | 2860                                                 | 107 | STO MEM |
| 2645                                         | 048 | 0       | 2861                                                 | 054 | 6       |
| 2646                                         | 042 | x       | 2862                                                 | 049 | 1       |
| 2647                                         | 109 | RCL MEM | Get KEnergy /km <sup>3</sup> and per km <sup>2</sup> |     |         |
| 2648                                         | 048 | 0       | 2903                                                 | 040 | (       |
| 2649                                         | 052 | 4       | 2904                                                 | 040 | (       |
| 2650                                         | 042 | x       | 2905                                                 | 109 | RCL MEM |
| 2651                                         | 049 | 1       | 2906                                                 | 054 | 6       |
| 2652                                         | 101 | EE      | 2907                                                 | 049 | 1       |
| 2653                                         | 051 | 3       | 2908                                                 | 042 | x       |
| 2654                                         | 111 | +/-     | 2909                                                 | 049 | 1       |
| 2655                                         | 041 | )       | 2910                                                 | 101 | EE      |
| Print total vortical energy /km <sup>2</sup> |     |         | 2911                                                 | 057 | 9       |
| Print and stow                               |     |         | 2912                                                 | 041 | )       |
| 2736                                         | 119 | print   | 2913                                                 | 119 | print   |
| 2737                                         | 107 | STO MEM | 2914                                                 | 042 | x       |
| 2738                                         | 054 | 6       | 2915                                                 | 109 | RCL MEM |
| 2739                                         | 051 | 3       | 2916                                                 | 048 | 0       |
| Get circumference energies                   |     |         | 2917                                                 | 052 | 4       |
| 2780                                         | 040 | (       | 2918                                                 | 042 | x       |
| 2781                                         | 109 | RCL MEM | 2919                                                 | 049 | 1       |
| 2782                                         | 054 | 6       | 2920                                                 | 101 | EE      |
| 2783                                         | 051 | 3       | 2921                                                 | 051 | 3       |
| 2784                                         | 042 | x       | 2922                                                 | 111 | +/-     |
| 2785                                         | 040 | (       | 2923                                                 | 041 | )       |
| 2786                                         | 109 | RCL MEM | 2924                                                 | 119 | print   |
| 2787                                         | 048 | 0       | 2925                                                 | 107 | STO MEM |
| 2788                                         | 050 | 2       | 2926                                                 | 054 | 6       |
| 2789                                         | 042 | x       | 2927                                                 | 053 | 5       |
| 2790                                         | 049 | 1       | Get circumference cell                               |     |         |
| 2791                                         | 101 | EE      | 2968                                                 | 040 | (       |
| 2792                                         | 051 | 3       | 2969                                                 | 109 | RCL MEM |
| 2793                                         | 111 | +/-     | 2970                                                 | 054 | 6       |
| 2794                                         | 041 | )       | 2971                                                 | 053 | 5       |
| 2795                                         | 042 | x       | 2972                                                 | 042 | x       |
| 2796                                         | 050 | 2       | 2973                                                 | 109 | RCL MEM |
| 2797                                         | 042 | x       | 2974                                                 | 048 | 0       |
| 2798                                         | 112 | pi      | 2975                                                 | 050 | 2       |
| 2799                                         | 041 | )       | 2976                                                 | 042 | x       |
| 2800                                         | 119 | print   | 2977                                                 | 050 | 2       |
| 2801                                         | 117 | SUM MEM | 2978                                                 | 042 | x       |

|                           |     |          |                             |     |         |
|---------------------------|-----|----------|-----------------------------|-----|---------|
| 2979                      | 112 | pi       | 3116                        | 042 | x       |
| 2980                      | 042 | x        | 3117                        | 040 | (       |
| 2981                      | 049 | 1        | 3118                        | 049 | 1       |
| 2982                      | 101 | EE       | 3119                        | 045 | -       |
| 2983                      | 051 | 3        | 3120                        | 040 | (       |
| 2984                      | 111 | +/-      | 3121                        | 057 | 9       |
| 2985                      | 041 | )        | 3122                        | 047 | /       |
| 2986                      | 119 | print    | 3123                        | 109 | RCL MEM |
| 2987                      | 117 | SUM MEM  | 3124                        | 048 | 0       |
| 2988                      | 054 | 6        | 3125                        | 049 | 1       |
| 2989                      | 054 | 6        | 3126                        | 041 | )       |
| 2990                      | 109 | RCL MEM  | 3127                        | 041 | )       |
| 2991                      | 054 | 6        | 3128                        | 041 | )       |
| 2992                      | 054 | 6        | Print total vortical energy |     |         |
| 2993                      | 119 | print    | 3169                        | 119 | print   |
| 2994                      | 040 | (        | 3170                        | 040 | (       |
| 2995                      | 109 | RCL MEM  | 3171                        | 109 | RCL MEM |
| 2996                      | 053 | 5        | 3172                        | 054 | 6       |
| 2997                      | 057 | 9        | 3173                        | 054 | 6       |
| 2998                      | 042 | x        | 3174                        | 042 | x       |
| 2999                      | 109 | RCL MEM  | 3175                        | 040 | (       |
| 3000                      | 053 | 5        | 3176                        | 040 | (       |
| 3001                      | 055 | 7        | 3177                        | 109 | RCL MEM |
| 3002                      | 041 | )        | 3178                        | 048 | 0       |
| Print -g vortical per m^3 |     |          | 3179                        | 049 | 1       |
| 3043                      | 119 | print    | 3180                        | 045 | -       |
| 3044                      | 107 | STO MEM  | 3181                        | 049 | 1       |
| 3045                      | 054 | 6        | 3182                        | 041 | )       |
| 3046                      | 050 | 2        | 3183                        | 042 | x       |
| 3047                      | 040 | (        | 3184                        | 053 | 5       |
| 3048                      | 109 | RCL MEM  | 3185                        | 048 | 0       |
| 3049                      | 054 | 6        | 3186                        | 041 | )       |
| 3050                      | 050 | 2        | 3187                        | 042 | x       |
| 3051                      | 047 | /        | 3188                        | 040 | (       |
| 3052                      | 109 | RCL MEM  | 3189                        | 049 | 1       |
| 3053                      | 054 | 6        | 3190                        | 045 | -       |
| 3054                      | 049 | 1        | 3191                        | 057 | 9       |
| 3055                      | 041 | )        | 3192                        | 047 | /       |
| Print ratio -Gibbs/torque |     |          | 3193                        | 109 | RCL MEM |
| 3096                      | 119 | print    | 3194                        | 048 | 0       |
| 3097                      | 039 | Dec JPNZ | 3195                        | 049 | 1       |
| 3098                      | 089 | Y        | 3196                        | 041 | )       |
| 3099                      | 040 | (        | 3197                        | 041 | )       |
| 3100                      | 109 | RCL MEM  | Print total kinetic energy  |     |         |
| 3101                      | 054 | 6        | 3238                        | 119 | print   |
| 3102                      | 052 | 4        | 3239                        | 048 | 0       |
| 3103                      | 042 | x        | 3240                        | 107 | STO MEM |
| 3104                      | 040 | (        | 3241                        | 053 | 5       |
| 3105                      | 040 | (        | 3242                        | 049 | 1       |
| 3106                      | 109 | RCL MEM  | 3243                        | 107 | STO MEM |
| 3107                      | 048 | 0        | 3244                        | 053 | 5       |
| 3108                      | 049 | 1        | 3245                        | 050 | 2       |
| 3109                      | 045 | -        | 3246                        | 107 | STO MEM |
| 3110                      | 049 | 1        | 3247                        | 054 | 6       |
| 3111                      | 041 | )        | 3248                        | 052 | 4       |
| 3112                      | 042 | x        | 3249                        | 107 | STO MEM |
| 3113                      | 053 | 5        | 3250                        | 054 | 6       |
| 3114                      | 048 | 0        | 3251                        | 054 | 6       |
| 3115                      | 041 | )        | 3252                        | 002 | HALT    |

1/9/22

@ = mru / 2

|                 |                  |
|-----------------|------------------|
| 1.              | 0001             |
| 5.              | 0005             |
| 5.              | 0004             |
| 5.              | 0003             |
| 5.              | 0006             |
| 1.225           | 0000             |
| 2.5             | 0001             |
| 2.5             | 0001             |
| 1.7             | 0001             |
| 6.371           | 0006             |
| 2.5             | 0001             |
| 5.65            | 0007             |
| 4.8816          | 0012             |
| 1.              | 0001             |
| 5.              | 0006 <i>p</i>    |
| 1.              | 0001 <i>rw</i>   |
| 5.              | 0005             |
| 1.              | 0001 ✓           |
| 4.843           | -0024 <i>t</i>   |
| 2.              | -0004            |
| 4.6331219435233 | 0002             |
| 7.272205216643  | -0005            |
| 3.2220789116881 | -0002            |
| 1.970176762768  | -0002            |
| 6.2071726199659 | -0003            |
| 1.0151373408699 | -0002            |
| 1.21075         | -0019            |
| 1.1480950109665 | 0015 @           |
| 3.4676880451549 | 0001             |
| 1.6794013202685 | -0022 - <i>g</i> |
| 3.4676880451549 | 0001             |
| 1.4627720739373 | -0037            |
| 2.2075913039907 | -0004            |
| 1.3580070616244 | 0012             |
| 2.5294239107991 | 0025             |
| 4.2479178553148 | 0003             |
| 4.2479178553148 | 0012             |
| 2.1239589276574 | 0013             |
| 6.6726137636549 | 0016             |
| 6.6726137636549 | 0016             |
| 6.125           | 0001             |
| 6.125           | 0010             |
| 3.0625          | 0011             |
| 9.6211275016187 | 0014             |
| 9.6211275016187 | 0014             |
| 4.2479178553148 | 0003             |
| 6.9353760903099 | 0001             |
| 5.              | 0006             |
| 9.              | 0000             |
| 4.5             | 0005 <i>R</i>    |
| 1.1111111111111 | 0001 ✓ <i>rw</i> |
| 5.979012345679  | -0024 <i>t</i>   |
| 2.7434842249657 | -0004            |
| 4.6331219435233 | 0002             |
| 7.272205216643  | -0005            |
| 3.2220789116881 | -0002            |
| 1.970176762768  | -0002            |
| 8.5146400822578 | -0003            |
| 1.3925066404251 | -0002            |
| 1.21075         | -0019            |



1.1480950109665 0015 @  
 3.4676880451549 0001  
 2.0733349632945 -0022 -90  
 3.4676880451549 0001  
 1.8058914493053 -0037  
 2.7254213629515 -0004  
 1.0999857199158 0012  
 2.5294239107991 0025  
 5.2443430312528 0003 P3  
 5.2443430312528 0012  
 2.6221715156264 0013  
 7.4140152929499 0016  
 1.4086629056605 0017  
 7.5617283950617 0001  
 7.5617283950617 0010  
 3.7808641975309 0011  
 1.0690141668465 0015  
 2.0311269170084 0015  
 5.2443430312528 0003  
 6.9353760903099 0001  
     5. 0006  
     8. 0000  
     4. 0005  
     1.25 0001  
     7.5671875 -0024 t  
     3.90625 -0004  
 4.6331219435233 0002  
 7.272205216643 -0005  
 3.2220789116881 -0002  
 1.970176762768 -0002  
 1.2123384023371 -0002  
 1.9826901188866 -0002  
     1.21075 -0019  
 1.1480950109665 0015  
 3.4676880451549 0001  
 2.6240645629196 -0022 -90  
 3.4676880451549 0001  
 2.285581365527 -0037  
 3.4493614124855 -0004  
 8.6912451943962 0011  
 2.5294239107991 0025  
 6.6373716489294 0003 P6  
 6.6373716489294 0012  
 3.3186858244647 0013  
 8.3407672045687 0016  
 2.2427396261174 0017  
     9.5703125 0001  
     9.5703125 0010  
     4.78515625 0011  
 1.2026409377023 0015  
 3.2337678547107 0015  
 6.6373716489294 0003  
 6.9353760903099 0001  
     5. 0006  
     7. 0000  
     3.5 0005  
 1.4285714285714 0001  
 9.8836734693878 -0024 t  
 5.8309037900875 -0004  
 4.6331219435233 0002

|    |               |       |    |
|----|---------------|-------|----|
| 7. | 272205216643  | -0005 |    |
| 3. | 2220789116881 | -0002 |    |
| 1. | 970176762768  | -0002 |    |
| 1. | 8096713177743 | -0002 |    |
| 2. | 9595840841689 | -0002 |    |
|    | 1.21075       | -0019 |    |
| 1. | 1480950109665 | 0015  |    |
| 3. | 4676880451549 | 0001  |    |
| 3. | 4273496332011 | -0022 | 90 |
| 3. | 4676880451549 | 0001  |    |
| 2. | 9852491304842 | -0037 |    |
| 4. | 5052883754912 | -0004 |    |
| 6. | 6542346019596 | 0011  |    |
| 2. | 5294239107991 | 0025  |    |
| 8. | 6692201128874 | 0003  | p9 |
| 8. | 6692201128874 | 0012  |    |
| 4. | 3346100564437 | 0013  |    |
| 9. | 5323053766499 | 0016  |    |
| 3. | 1959701637824 | 0017  |    |
|    | 1.25          | 0002  |    |
|    | 1.25          | 0011  |    |
|    | 6.25          | 0011  |    |
| 1. | 3744467859455 | 0015  |    |
| 4. | 6082146406563 | 0015  |    |
| 8. | 6692201128874 | 0003  |    |
| 6. | 9353760903099 | 0001  |    |
|    | 5.            | 0006  |    |
|    | 6.            | 0000  |    |
|    | 3.            | 0005  |    |
| 1. | 6666666666667 | 0001  |    |
| 1. | 3452777777778 | -0023 |    |
| 9. | 2592592592593 | -0004 |    |
| 4. | 6331219435233 | 0002  |    |
| 7. | 272205216643  | -0005 |    |
| 3. | 2220789116881 | -0002 |    |
| 1. | 970176762768  | -0002 |    |
| 2. | 873691027762  | -0002 |    |
| 4. | 6997099114349 | -0002 |    |
|    | 1.21075       | -0019 |    |
| 1. | 1480950109665 | 0015  |    |
| 3. | 4676880451549 | 0001  |    |
| 4. | 6650036674126 | -0022 | 90 |
| 3. | 4676880451549 | 0001  |    |
| 4. | 0632557609369 | -0037 |    |
| 6. | 1321980666408 | -0004 |    |
| 4. | 8888254218479 | 0011  |    |
| 2. | 5294239107991 | 0025  |    |
| 1. | 1799771820319 | 0004  |    |
| 1. | 1799771820319 | 0013  |    |
| 5. | 8998859101595 | 0013  |    |
| 1. | 1121022939425 | 0017  |    |
| 4. | 3080724577248 | 0017  |    |
| 1. | 7013888888889 | 0002  |    |
| 1. | 7013888888889 | 0011  |    |
| 8. | 5069444444444 | 0011  |    |
| 1. | 6035212502698 | 0015  |    |
| 6. | 2117358909261 | 0015  |    |
| 1. | 1799771820319 | 0004  | p9 |
| 6. | 9353760903099 | 0001  |    |
|    | 5.            | 0006  |    |

1.9140625 0012  
2.4052818754047 0015  
1.0541243266655 0016  
2.6549486595718 0004 Pa  
6.9353760903099 0001  
5. 0006  
3. 0000  
1.5 0005  
3.33333333333333 0001  
5.38111111111111 -0023 Ry  
7.4074074074074 -0003  
4.6331219435233 0002  
7.272205216643 -0005  
3.2220789116881 -0002  
1.970176762768 -0002  
2.2989528222096 -0001  
3.7597679291479 -0001  
1.21075 -0019  
1.1480950109665 0015  
3.4676880451549 0001  
1.866001466965 -0021 - 9°  
3.4676880451549 0001  
1.6253023043747 -0036  
2.4528792266563 -0003  
1.222206355462 0011  
2.5294239107991 0025  
4.7199087281276 0004  
4.7199087281276 0013  
2.3599543640638 0014  
2.224204587885 0017  
9.5349532392546 0017  
6.80555555555556 0002  
6.80555555555556 0011  
3.40277777777778 0012  
3.2070425005396 0015  
1.3748285767194 0016  
4.7199087281276 0004 Pa  
6.9353760903099 0001  
5. 0006  
2. 0000  
1. 0005  
5. 0001  
1.21075 -0022  
2.5 -0002  
4.6331219435233 0002  
7.272205216643 -0005  
3.2220789116881 -0002  
1.970176762768 -0002  
7.7589657749574 -0001  
1.2689216760874 0000  
1.21075 -0019  
1.1480950109665 0015  
3.4676880451549 0001  
4.1985033006713 -0021 - 9°  
3.4676880451549 0001  
3.6569301848432 -0036  
5.5189782599767 -0003  
5.4320282464976 0010  
2.5294239107991 0025  
1.0619794638287 0005 Pa



|                 |       |
|-----------------|-------|
| 1.0619794638287 | 0014  |
| 5.3098973191435 | 0014  |
| 3.3363068818275 | 0017  |
| 1.2871260121082 | 0018  |
| 1.53125         | 0003  |
| 1.53125         | 0012  |
| 7.65625         | 0012  |
| 4.8105637508094 | 0015  |
| 1.8558849518003 | 0016  |
| 1.0619794638287 | 0005  |
| 6.9353760903099 | 0001  |
| 5.              | 0006  |
| 1.              | 0000  |
| 5.              | 0004  |
| 1.              | 0002  |
| 4.843           | -0022 |
| 2.              | -0001 |
| 4.6331219435233 | 0002  |
| 7.272205216643  | -0005 |
| 3.2220789116881 | -0002 |
| 1.970176762768  | -0002 |
| 6.2071726199659 | 0000  |
| 1.0151373408699 | 0001  |
| 1.21075         | -0019 |
| 1.1480950109665 | 0015  |
| 3.4676880451549 | 0001  |
| 1.6794013202685 | -0020 |
| 3.4676880451549 | 0001  |
| 1.4627720739373 | -0035 |
| 2.2075913039907 | -0002 |
| 1.3580070616244 | 0010  |
| 2.5294239107991 | 0025  |
| 4.2479178553148 | 0005  |
| 4.2479178553148 | 0014  |
| 2.1239589276574 | 0015  |
| 6.6726137636549 | 0017  |
| 1.9543873884737 | 0018  |
| 6.125           | 0003  |
| 6.125           | 0012  |
| 3.0625          | 0013  |
| 9.6211275016187 | 0015  |
| 2.8179977019622 | 0016  |
| 4.2479178553148 | 0005  |
| 6.9353760903099 | 0001  |
| 8.7947432481316 | 0019  |
| 1.268098965883  | 0018  |

-g°

g/p

GIBGRAV1:2 31/8/22

Input radius, cgs

0080 096 LABEL  
0081 082 R  
0082 107 STO MEM  
0083 048 0  
0084 049 1

0085 119 print  
0086 002 HALT

Input particle mass number n

0127 096 LABEL  
0128 077 M  
0129 107 STO MEM  
0130 048 0  
0131 050 2  
0132 119 print  
0133 002 HALT

Execute program

0174 096 LABEL  
0175 088 X

Stow Planck's h-

0216 049 1  
0217 046 .  
0218 048 0  
0219 053 5  
0220 052 4  
0221 053 5  
0222 057 9  
0223 049 1  
0224 056 8  
0225 053 5  
0226 101 EE  
0227 050 2  
0228 055 7  
0229 111 +/-  
0230 107 STO MEM  
0231 057 9  
0232 056 8  
0233 119 print

Stow mass H atom

0274 049 1  
0275 046 .  
0276 054 6  
0277 055 7  
0278 050 2  
0279 054 6  
0280 049 1  
0281 052 4  
0282 101 EE  
0283 050 2  
0284 052 4  
0285 111 +/-  
0286 107 STO MEM  
0287 057 9  
0288 054 6  
0289 119 print

Stow light speed c

0330 050 2  
0331 046 .  
0332 057 9

0333 057 9

0334 055 7

0335 057 9

0336 050 2

0337 052 4

0338 053 5

0339 056 8

0340 101 EE

0341 049 1

0342 048 0

0343 107 STO MEM

0344 057 9

0345 053 5

0346 119 print

Stow gravitational constant G

0387 054 6

0388 046 .

0389 054 6

0390 055 7

0391 052 4

0392 048 0

0393 056 8

0394 101 EE

0395 056 8

0396 111 +/-

0397 107 STO MEM

0398 057 9

0399 055 7

0400 119 print

Stow Boltzmann's constant k

0441 049 1

0442 046 .

0443 051 3

0444 056 8

0445 048 0

0446 054 6

0447 050 2

0448 050 2

0449 053 5

0450 057 9

0451 101 EE

0452 049 1

0453 054 6

0454 111 +/-

0455 107 STO MEM

0456 057 9

0457 057 9

0458 119 print

0459 107 STO MEM

0460 056 8

0461 048 0

Stow Earth's mass

0502 053 5

0503 046 .

0504 057 9

0505 055 7

0506 050 2

0507 101 EE

0508 050 2

0509 055 7

|      |     |         |
|------|-----|---------|
| 1842 | 040 | (       |
| 1843 | 109 | RCL MEM |
| 1844 | 056 | 8       |
| 1845 | 057 | 9       |
| 1846 | 047 | /       |
| 1847 | 109 | RCL MEM |
| 1848 | 057 | 9       |
| 1849 | 053 | 5       |
| 1850 | 113 | Square  |
| 1851 | 041 | )       |

|                   |     |         |
|-------------------|-----|---------|
| Print mass quanta |     |         |
| 1892              | 119 | print   |
| 1893              | 042 | x       |
| 1894              | 109 | RCL MEM |
| 1895              | 048 | 0       |
| 1896              | 049 | 1       |
| 1897              | 041 | )       |
| Print mr inertia  |     |         |
| 1938              | 119 | print   |
| 1939              | 002 | HALT    |



GIBGRAN 1

31/8/22

5. 0009  
2.8 0001  
1.05459185 -0027  
1.672614 -0024  
2.99792458 0010  
6.67408 -0008  
1.38062259 -0016  
5.972 0027  
3.985760576 0020  
4.4347567283027 -0001  
2.8233882396865 0005  
6.611414175989 -0008  
3.1345843304161 0019  
5.646776479373 -0005  
3.7333178064368 -0012  
1.6759465945012 -0010  
4.4891613342202 0001  
5.3466310612186 -0030  
8.0689298166073 -0004  
1.2393217226178 0003  
3.7153930547639 0013  
1.1826463403899 0003  
1.1137937863551 -0002  
1. 0010  
1.05459185 -0027  
1.672614 -0024  
2.99792458 0010  
6.67408 -0008  
1.38062259 -0016  
5.972 0027  
3.985760576 0020  
4.4347567283027 -0001  
1.9964369702047 0005  
0. 0000  
0. 0000  
1.9964369702047 -0005  
0. 0000  
0. 0000  
1. 0000  
1. 0000  
1.5091615120285 0026  
6.6261960169913 -0027  
1.9864835911236 -0016  
3.1615868289827 -0027  
2.1054261578165 -0032  
1. 0010  
2.8 0001  
1.05459185 -0027  
1.672614 -0024  
2.99792458 0010  
6.67408 -0008  
1.38062259 -0016  
5.972 0027  
3.985760576 0020  
4.4347567283027 -0001  
1.9964369702047 0005  
9.3499515941494 -0008  
4.4329716724766 0019  
1.9964369702047 -0005  
1.8666589032184 -0012
